# Supplementary material for: The rumen microbiome inhibits methane formation through dietary choline supplementation
Source: Sci Rep. 2021 Nov 5;11:21761. doi: 10.1038/s41598-021-01031-w (PMC8571420; doi:10.1038/s41598-021-01031-w)
Supplement: Supplementary file 2 — Supplementary Information 2. [file 41598_2021_1031_MOESM2_ESM.xlsx]

## Sheet: Supplementary Table S3
Sample	B0	B6-10	B6-15	B5-10	B5-15	B9-10	B9-15	C0	C1-10	C1-15	C2-10	C2-15	C3-10	C3-15	F0	F1-10	F1-15	F2-10	F2-15	F3-10	F3-15	G0	G1-10	G1-15	G2-10	G2-15	G4-10	G4-15
Cow	C1	C1	C1	C1	C1	C1	C1	C2	C2	C2	C2	C2	C2	C2	C2	C2	C2	C2	C2	C2	C2	C1	C1	C1	C1	C1	C1	C1
Condition	Inoculum	Control	Control	Choline chloride	Choline chloride	Choline bicarbonate	Choline bicarbonate	Inoculum	Control	Control	Choline chloride	Choline chloride	Choline bicarbonate	Choline bicarbonate	Inoculum	Control	Control	Choline chloride	Choline chloride	Choline bicarbonate	Choline bicarbonate	Inoculum	Control	Control	Choline chloride	Choline chloride	Choline bicarbonate	Choline bicarbonate
1,"unknown UBA1436 [rumen_mOTU_2276]"	0	0	0	0	0	0	0	0	0	9.97e-05	0	0	0	0	0	8.66e-05	0.000156348	0	0	0	0	0	0.0110543	0	0	0	0	0
2,"unknown UBA4716 [rumen_mOTU_2215]"	0	0	0	0	0	0	0	0	0.0108245	9.97e-05	0	0	0	0	0	0.00017313	0	0	0	0	0	0	0.000182715	0.000187231	0	0	0	0
3,"unknown Solobacterium [rumen_mOTU_2274]"	0	0	0	0	0	0.000465252	0	0	0	0	0	0	0	0	0	0	0	0	0	0.011518	0.00052407	0	0	0	0	0	0	0
4,"Bacillus thermoamylovorans [ref_mOTU_v25_06237]"	0	0	0	0	0	0	0	0	0	0	0	0	9.26e-05	0.0104578	0	0	0	0	0.00100366	0	0.00104814	0	0	0	0	0	0	0.000106157
5,"unknown Bact-11 [rumen_mOTU_2266]"	0	0	0	0	0	0	0	0	0	0	0	0	0	0	0	0.00251039	0.0103971	0	0	0	0	0	0	0	0	0	0	0
6,"unknown UBA2912 [rumen_mOTU_2232]"	0	0.000126271	0	0.000986436	8.3e-05	5.82e-05	5.09e-05	0.000244081	9.02e-05	0	0.0101338	0.000607323	9.26e-05	0	0	0	0	0	0	0	0	0	0.000274073	9.36e-05	0.000345423	4.47e-05	6.38e-05	0
7,"unknown WCHB1-69 [rumen_mOTU_2240]"	0	0	0	0	0	0	0	0.000976324	0	0	0	0	0	0	0.0130486	0.00034626	0	4.2e-05	0	0	0	0	0	0	0	0	0	0
8,"unknown Bacteroidales [rumen_mOTU_188]"	0.000293341	0.000126271	0	0	0	0	0	0.000244081	0	0	0	0	0	0	0.000197707	0	0	0	0	0	0	0.000929368	0.0123333	0.000468077	0	0	0	0
9,"unknown F082 [rumen_mOTU_2191]"	0.000293341	0.0133847	5.84e-05	0	0	0	0	0	0	0	0	0	0	0	0.000197707	0	0	0	0	0	0	0.000464684	0	0.000280846	0	0	0	0
10,"unknown F082 [rumen_mOTU_2244]"	0	0	0	0	0	0	0	0.000244081	0	0	0	0	0	0	0.014828	0	0	0	0	0	0	0	0	0	0	0	0	0
11,"unknown Prevotella [rumen_mOTU_2294]"	0.000880023	6.31e-05	5.84e-05	0	0	0	0	0	0	0	0	0	0	0	0	0	0	0	0	0	0	0.000464684	0.00210122	0.0115147	0	0	0	0
12,"unknown Prevotella [rumen_mOTU_2181]"	0	0	0	0.000937115	0.0146564	0	0	0	0	0	0	0	0	0	0	0	0	0	0	0	0	0	0	0	0	0.000491225	0	0
13,"unknown Bacteroidales [rumen_mOTU_147]"	0	0	0	0	0.011584	0	0	0	0	0	0	0.00511886	0	0	0	0	0	0	0	0	0	0	0	0	0	0	0	0
14,"unknown RC9 [rumen_mOTU_2213]"	0	0	0	0	0	0	0	0.0165975	0	0	5.6e-05	0	0.000185168	0	0.000197707	0	0	0	0	0	0	0	0	0	0	0	0	0
15,"unknown UBA2912 [rumen_mOTU_2177]"	0	0	0.000233522	0.0133169	0.00124559	5.82e-05	0	0	0	9.97e-05	0.000895807	0.000433802	0	0	0	0	0	0	0	7.94e-05	0	0	0	0	0.000690846	0.000267941	0	0
16,"unknown UBA1067 [rumen_mOTU_2239]"	0	0	0	0	0	0	0	0	0	0	0	0	0	0	0.0173982	0	0	4.2e-05	0	7.94e-05	0	0	0	0	0	0	0	0
17,"unknown UBA4372 [rumen_mOTU_2194]"	0.000293341	0.0125008	0.000408664	0	0	0	0	0.000488162	0.000180408	0.000996512	0	0	0	0	0.000395413	0.0017313	0.000234522	4.2e-05	0	0	0	0.000464684	0.000274073	9.36e-05	0	0	0	0
18,"unknown RF16 [rumen_mOTU_2246]"	0	0.000315676	5.84e-05	0	0	0	0	0.00170857	0	0	0	0	0	0	0.0152234	0	0	0	0	0	0	0.000929368	0	0	0	0	0	0
19,"unknown Enterococcus_F [rumen_mOTU_768]"	0	0	0	0	0	0.0123873	0.000763048	0	0	0	0	0	0	0.000207771	0	0	0	0	0	0	7.49e-05	0	0	0	0	0.00013397	0.0040845	0.0007431
20,"unknown RF16 [rumen_mOTU_2242]"	0.000586682	0.000315676	5.84e-05	0	0	0	0	0.000244081	0	0	0	0	0	0	0.0150257	8.66e-05	0	0	0	0	0	0.00232342	0	0	0	0	0	0
21,"uncultured Prevotella sp. [rumen_mOTU_127]"	0	0	0	0	0	0	0	0	0	0	0	0	0	0	0.000395413	0	0	0	0	0	0	0.0185874	0	0	0	0	0	0
22,"unknown RF16 [rumen_mOTU_603]"	0.0181872	0	0	0	0	0	0	0	0	0	0	0	0	0	0.00118624	0	0	0	0	0	0	0	0	0	0	0	0	0
23,"unknown WCHB1-69 [rumen_mOTU_748]"	0	0.00707115	0.0109172	0	0	0	0	0.000488162	9.02e-05	0	0	0	0	0	0	0	0	0	0	0	0	0.000929368	0	0	0	0	0	0
24,"unknown Prevotellaceae [rumen_mOTU_89]"	0.000293341	0.00113644	5.84e-05	0	0	0	0	0	0.000902039	0.0111609	0.000335927	8.68e-05	0	0	0	0.00034626	0.00562852	0	0	0	0	0	0	0	0	0	0	0
25,"unknown RC9 [rumen_mOTU_781]"	0	0	0	0	0	0	0	0	0.00604366	0.0116592	0	0	0	0	0.000197707	0.000865651	0.00187617	0	0	0	0	0	0.000182715	0.000187231	0	0	0	0
26,"unknown Bacteroidales [rumen_mOTU_2283]"	0.000293341	0.000315676	0.000817327	0	0	0	0	0	0.000902039	0	0	0	0	0	0.000395413	0.00034626	0.000938086	4.2e-05	0	0	0	0.000464684	0.0156221	0.00102977	0	0	0	0
27,"unknown Prevotellaceae [rumen_mOTU_66]"	0.0117336	0.000189406	0.000175142	4.93e-05	0	0	0	0.000488162	0.000631427	0.000398605	0	0	0	0	0.00257019	0.000952216	0.000234522	4.2e-05	0	0	0	0.00371747	9.14e-05	0.000187231	0	0	0	0
28,"unknown Prevotellaceae [rumen_mOTU_458]"	0.0161338	0	0	0	0	0	0	0.00219673	9.02e-05	0	0	0	0	0	0.00138395	0	0	0	0	0	0	0.00325279	0	0	0	0	0	0
29,"unknown UBA2856 [rumen_mOTU_809]"	0.000293341	0.000757624	0.000934088	0	0	0	0	0.000244081	0.000451019	0.00199302	0	0	0	0	0.00059312	0.000952216	0.0014853	4.2e-05	0	0	0	0	0.00328887	0.0125445	0	0	0	0
30,"unknown UBA4372 [rumen_mOTU_2217]"	0.000880023	0.000568218	0.000291903	0	0	0	0	0.000244081	0.014613	0.00279023	0	0	0	0	0.000790826	0.000779086	0.00226704	0	0	0	0	0.000464684	0	0	0	0	0	0
31,"Lactobacillus ingluviei [ref_mOTU_v25_03057]"	0	0	0	0	0	0	0	0	0	0	5.6e-05	8.68e-05	0.000185168	0.00595609	0	8.66e-05	0.000156348	0.00176212	0.00245897	0.000317738	0.0130269	0	0	0	0	0	0	0
32,"unknown Prevotella [rumen_mOTU_2234]"	0.00322675	0.000378812	0.0026855	0	0	0	0	0.000244081	0.000451019	0.00079721	0.000167964	0.0103245	0	0	0.00158165	0.000432825	7.82e-05	4.2e-05	0	0	0	0.00139405	0.000639503	0.00168508	5.76e-05	0	0	0
33,"unknown Prevotella [rumen_mOTU_2209]"	0	0	0	0	0	0	0	0.0187942	0.00171387	0.00308919	0	0	0	0	0.000988533	0	0	0	0	0	0	0	0	0	0	0	0	0
34,"unknown Prevotella [rumen_mOTU_2211]"	0.00117336	0	0	0	0	0	0	0.020991	0	0	0	0	0	0	0.00158165	0	0	0	0	0	0	0.000929368	0	0	0	0	0	0
35,"unknown UBA9732 [rumen_mOTU_693]"	0	0.0104173	0.00934088	0	0	0	0	0	0	9.97e-05	0	0	0	0	0	0.00121191	0.00273609	0	0	0	0	0	0.00036543	0.000748923	0	0	0	0
36,"Clostridium cochlearium [ref_mOTU_v25_02882]"	0	0	0	0	0	0.000116313	0.000813918	0	0	0	0	0	0.00583279	0.0122585	0	0	0	0	0	0	0.000224601	0	0	0	0	0	0.000574383	0.0052017
37,"Succinivibrio dextrinosolvens [ref_mOTU_v25_02461]"	0.000293341	0.000126271	0.000350283	4.93e-05	0	0	0	0.000244081	0.000180408	0	0.00167964	0.00355718	0	0	0.000197707	0.000259695	0.000234522	0.0111601	0.00712601	7.94e-05	0	0	0.000274073	0.000187231	0.000115141	4.47e-05	0	0
38,"Bifidobacterium merycicum [ref_mOTU_v25_04325]"	0	0.000189406	5.84e-05	0.000197287	0.00357069	0.000465252	0	0	0	0	0	0	0	0	0	0	0	0	0.000200733	0	0	0	0.00155308	0.000280846	0.00990213	0.0108516	6.38e-05	0
39,"unknown Clostridiales [rumen_mOTU_52]"	0	0	0.000175142	0.00108508	0.0149471	0	0	0	0	0	0	0	0	0	0	0	0	0	0	0	0	0	0	9.36e-05	0.00264824	0.00893136	0	0
40,"unknown Prevotellaceae [rumen_mOTU_210]"	0.00381344	0	0	0	0	5.82e-05	0	0.00536978	0	0	0	0	0	0	0.00850138	0	0	0	0	7.94e-05	0	0.010223	0	0	0	0	0	0
41,"unknown Bacteroidales [rumen_mOTU_875]"	0.00146671	0	0	0	0	5.82e-05	0	0.0187942	0	0	5.6e-05	0	0	0	0.00237248	0	0	0	0	0	0	0.00557621	0	0	0	0	6.38e-05	0
42,"unknown UBA9959 [rumen_mOTU_754]"	0	0.012122	0.00256874	0	0	0	0	0	0.00595345	0.000896861	0	0	0	0	0	0.00164474	0.00171982	0	0	0	0	0.000929368	0.00155308	0.00102977	0	0	0	0
43,"Butyrivibrio sp. AE2015 [ref_mOTU_v25_03789]"	0	6.31e-05	0.000233522	0.00478422	0.000788873	0	0	0.0012204	9.02e-05	9.97e-05	0.0119254	0.00633351	0	0	0.000395413	8.66e-05	0.000234522	0.000797147	0.000501832	0	0	0	0	0.000187231	0.000690846	0.00013397	0	0
44,"unknown Bacteroidales [rumen_mOTU_751]"	0	0.00909148	0.000875708	0	0	0	0	0	0	0	0	0	0	0	0	0	0	0	0	0	0	0	0.0158962	0.00318293	0	0	0	0
45,"Sharpea azabuensis [ref_mOTU_v25_04332]"	0	0	0	0	0	0	0	0	0	0	0.00610268	0.0171786	0.00092584	0.00263176	0	0	0	4.2e-05	0.00095348	7.94e-05	0.00119787	0	0	0	0	0	0	0
46,"unknown Clostridiales [rumen_mOTU_151]"	0	0	0	0.000197287	0.00701682	0	0.00162784	0	0	0	0	0	0	0	0	0	0	0	0	0	0	0	0	0	0.000460564	0.010405	0.00153169	0.0081741
47,"unknown Methanosphaera [rumen_mOTU_774]"	0.000293341	0.000126271	5.84e-05	9.86e-05	8.3e-05	0.000174469	0	0.000488162	0.0155151	0.0079721	0.000615867	0.000173521	0.000555504	6.93e-05	0.000197707	0.000259695	0.000156348	0.000125865	5.02e-05	0.000397172	7.49e-05	0	0.00146172	9.36e-05	5.76e-05	8.93e-05	0.000255281	0
48,"unknown Helcococcus [rumen_mOTU_770]"	0	0	0	0	0	0.0134341	0.00498525	0	0	0	0.000111976	8.68e-05	0	0.000138514	0	0	0	0	0	0.000158869	0.00554017	0	0	0	0	0	0.00102112	0.00408705
49,"unknown RUG440 [rumen_mOTU_802]"	0.000293341	0.000315676	0.00116761	4.93e-05	0	0	0	0.00146449	0.00108245	0.00119582	5.6e-05	0	0	0	0.00197707	0.00579986	0.00164165	0	0	0	0	0.000464684	0.0108716	0.00327654	0	0	0	0
50,"unknown Saccharimonadaceae [rumen_mOTU_2299]"	0	0.000505082	0.00128437	0	0	0	0	0	0	0	0	0	0	0	0	0	0	0	0	0	0	0	0.000548145	0.0273357	0	0	0	0
51,"unknown Prevotella [rumen_mOTU_1321]"	0.00205339	0	0	0	0	0	0	0.0129363	0.000180408	0	0	0	0	0	0.0104785	0	0	0	0	0	0	0.00418216	0	0	0	0	0	0
52,"unknown Oscillospiraceae [rumen_mOTU_2295]"	0.000293341	0.00252541	0.000350283	0	0	0	0	0	0	0	0	0	0	0	0	0.000432825	0.000234522	0	0	0	0	0.000464684	0.00621232	0.0200337	0	0	0	0
53,"Selenomonas ruminantium [ref_mOTU_v25_03812]"	0.000586682	0.000441947	0.000758947	0.00177559	0.000207598	0	0	0.000732243	0.000992242	0.000398605	0.000503891	0.00112788	0	0	0.000790826	0.00103878	0.000547217	0.00352423	0.0115923	0	0	0.000464684	0.000730861	0.000748923	0.00241796	0.00125039	0.000127641	5.31e-05
54,"unknown Oscillospiraceae [rumen_mOTU_2281]"	0.00293341	0.00378812	0.000175142	0	0	0	0	0	0.000270612	0.000199302	0	0	0	0	0.000395413	0.00147161	7.82e-05	0	0	0	0	0.00185874	0.0109629	0.00879985	0	0	0	0
55,"Eubacterium pyruvativorans [ref_mOTU_v25_04719]"	0	0	5.84e-05	0.000838471	0.0252024	0	0	0	0	0	0	0	0	0	0	0	0.000156348	0	0.000100366	0	0	0	0	0	0.00356937	0.000848479	0	0.00037155
56,"Sutterella sp. CAG:351 [meta_mOTU_v25_13411]"	0	0	0	0.00286067	0.0196388	0	0.000559569	0	0	0	0	0	0	0	0	0	0	8.39e-05	0.000100366	0	0	0	0	0	0.00149683	0.0058947	0.000255281	0.000477707
57,"unknown Prevotella [rumen_mOTU_2247]"	0.00117336	0.000694488	0.00192656	0	0	0	0	0.000976324	0.000270612	9.97e-05	0	0	0	0	0.0209569	0.00207756	0.00125078	4.2e-05	0	0	0	0.00185874	0.000274073	0	0	0	0	0
58,"unknown CAG-826 [rumen_mOTU_2241]"	0	0	0	0	0	0	0	0.0012204	0	0	0	0	0	0	0.0308422	0	0	4.2e-05	0	7.94e-05	0	0	0	0	0	0	0	0
59,"unknown Prevotellaceae [rumen_mOTU_871]"	0.00205339	0	0	0	0	0	0	0.0112277	9.02e-05	0	0	0	0	0	0.0118624	0	0	0	0	7.94e-05	0	0.00697026	0	0	0	0	0	0
60,"unknown F23-D06 [rumen_mOTU_721]"	0.0187738	0.00833386	0.000467044	0.000147965	0	0	0	0.00170857	0	0	0	0	0	0	0	0	0	0	0	0	0	0.00325279	0	0	0	0	0	0
61,"unknown Clostridium_B [rumen_mOTU_2233]"	0	0	0	0	0.000166078	0	0	0	0	0	0	0.0316675	0	0	0	0	0	4.2e-05	0.000301099	0	0	0	0	0	0.000115141	0.00116108	0	0
62,"unknown F082 [rumen_mOTU_743]"	0.000586682	0.00549277	0.000233522	0	0	0	0	0.000732243	0.00126285	0	0	0	0	0	0.00138395	0	0	4.2e-05	0	0	0	0.00325279	0.00511602	0.0165699	5.76e-05	0	0	0
63,"unknown F082 [rumen_mOTU_2175]"	0.0296275	0.000568218	5.84e-05	0	0	0	0	0.00146449	0	0	0	0	0	0	0.00059312	0	0	0	0	0	0	0.00232342	0.000182715	0.000187231	0	0	0	0
64,"unknown GCA-900199385 [rumen_mOTU_795]"	0.00146671	0.00170465	0.000992469	0	0	0	0	0.0039053	0.00216489	0.0038864	0	0	0	0	0.0116647	0.00450139	0.00343965	8.39e-05	0	0.000158869	0	0.000929368	0.000182715	0	0	0	0	0
65,"unknown UBA2912 [rumen_mOTU_694]"	0	0.000126271	0.000700566	9.86e-05	0	0	0	0.000244081	9.02e-05	0.0281016	0.000503891	0	0	0	0	0.000259695	0.00406504	0	0	7.94e-05	0	0	0	0.000842539	5.76e-05	0	0	0
66,"unknown Bacteroidales [rumen_mOTU_240]"	0.000293341	0	0	0	0	0	0	0	0	0	0	0	0	0	0.0338078	0	0	0	0	0	0	0.000929368	9.14e-05	9.36e-05	0	0	0	0
67,"unknown Prevotella [rumen_mOTU_737]"	0	0	0	0.00636252	0.0154453	0	0	0	0	0	0	0	0	0	0	0	0	0	0	0	0	0	0	0	0.00143926	0.0121467	0	0
68,"uncultured Prevotella sp. [rumen_mOTU_132]"	0.00938692	0	0	0	0	0	0	0.00292897	0.00144326	0.00109616	0	0	0	0	0.011467	0.00017313	0	0	0	0	0	0.00929368	0.000274073	9.36e-05	0	0	0	0
69,"unknown ISO4-G1 [rumen_mOTU_752]"	0.000293341	0.00669234	0.00116761	9.86e-05	0	0.000116313	0	0	0.00153347	0.000199302	0.000783831	0	9.26e-05	6.93e-05	0.00118624	0.000952216	0.00101626	0.000545416	0.000100366	0.000397172	0	0.00185874	0.00849625	0.0104849	5.76e-05	0	6.38e-05	0
70,"unknown Bacteroidales [rumen_mOTU_50]"	0.00352009	0.000126271	0.00128437	0	0	5.82e-05	0	0.0129363	0.000180408	0	0.000111976	0	0	0	0.0061289	0.00034626	0.00109443	0	0	0	0	0.010223	9.14e-05	0.000187231	0	0	0	0
71,"uncultured Prevotella sp. [rumen_mOTU_167]"	0.00704019	0	0	0	0	0	0	0.00927508	0.000451019	0.000498256	0	0	0	0	0.0108739	8.66e-05	7.82e-05	0	0	0	0	0.00789963	9.14e-05	0	0	0	0	0
72,"unknown Agathobacter [rumen_mOTU_739]"	0	0.000378812	0.000175142	0.000739827	0.00215902	0	0	0	0	0	0.00867813	0.0144022	0.00148134	0.0030473	0	0	0	0.000755192	0.000552015	0.00444833	0.000299468	0	0	0	0	0	0	0
73,"unknown Selenomonadaceae [rumen_mOTU_561]"	0	0.00303049	0.00338607	0.00192355	0.00813784	0	0	0	0	0	0	0	0	0	0	0.000259695	0.000938086	0.000125865	0.000100366	0	0	0	0.0105975	0.00496162	0.00287853	0.000937793	0	0
74,"unknown F082 [rumen_mOTU_534]"	0.00205339	0.000568218	0.000116761	0	0	0	0	0.0012204	9.02e-05	0	0	0	0	0	0.00158165	0	0	0	0	0	0	0.0027881	0.000182715	0.029208	0	0	6.38e-05	0
75,"unknown Prevotella [rumen_mOTU_2238]"	0.000293341	0	0	0	0	0	0	0.0012204	0.00126285	0.00079721	0	0	0	0	0.0144326	0.0180921	0.00242339	0	0	0	0	0	0	0	0	0	0	0
76,"unknown F23-D06 [rumen_mOTU_2210]"	0.000880023	6.31e-05	0	0	0	0	0	0.036124	0	0	0	0	0	0	0.00138395	0	0	0	0	0	0	0.000464684	0	0	0	0	0	0
77,"unknown RF16 [rumen_mOTU_2245]"	0	0	0	0	0	0	0	0.000732243	0	0	0	0	0	0	0.0385528	0	0	4.2e-05	0	0	0	0	0	0	0	0	0	0
78,"unknown Bacteroidales [rumen_mOTU_842]"	0.000293341	6.31e-05	0.000175142	0	0	0	0	0.0012204	0.0167779	0.00767314	0	0	0	0	0.00276789	0.00484765	0.00492495	0.000125865	0	7.94e-05	0	0.000464684	0.000274073	9.36e-05	0	0	0	0
79,"unknown Prevotellaceae [rumen_mOTU_21]"	0.025814	0	0	0	0	0	0	0.00292897	9.02e-05	0.000199302	0	0	0	0	0.00138395	8.66e-05	0.000156348	0	0	0	0	0.00929368	0	0	0	0	0	0
80,"unknown RC9 [rumen_mOTU_426]"	0.000293341	0.00385125	0.00373635	0	0	0	0	0.000488162	0.00117265	0.00189337	0	0	0	0	0.00059312	0.00034626	0.000390869	0	0	0	0	0.000464684	0.0103234	0.0168508	0	0	0	0
81,"unknown Prevotella [rumen_mOTU_415]"	0.00146671	0	0	0	0	0	0	0.000244081	9.02e-05	9.97e-05	0	0	0	0	0.0156188	0.00017313	7.82e-05	0	0	0	0	0.0227695	0	0	0	0	0	0
82,"Clostridium sp. KNHs214 [ref_mOTU_v25_08546]"	0	0	0	0	0	0.0186101	0.00315393	0	0	0	0	0	0.00268494	0.0096267	0	0	0	0	0	0	0.00134761	0	0	0	0	0	0.0053609	0.000318471
83,"unknown Prevotella [rumen_mOTU_390]"	0.00352009	0	0	0	0	0	0	0.0107396	0.00279632	0.00338814	0	0	0	0	0.0130486	0.000952216	0.000625391	0	0	0	0	0.00650558	0.000274073	0	0	0	0	0
84,"unknown Prevotellaceae [rumen_mOTU_134]"	0.0255207	0	0	0	0	0	0	0.00805467	0.000541223	0.000298954	0	0	0	0	0.000988533	0	0	0	0	0	0	0.00743494	0	0	0	0	0	0
85,"unknown RC9 [rumen_mOTU_799]"	0.000880023	0.000189406	0.000116761	0	0	0	0	0.00439346	0.00360815	0.00149477	5.6e-05	0	0	0	0.00355872	0.0118594	0.0174328	4.2e-05	0	0	0	0	9.14e-05	0	0	0	0	0
86,"unknown Prevotella [rumen_mOTU_507]"	0.000586682	0	5.84e-05	0	0	0	0	0	0.00108245	0.00129547	0	0	0	0	0.00177936	0.0161877	0.0212633	0	0	0	0	0.000929368	0.000456788	0.000561693	0	0	0	0
87,"unknown UBA737 [rumen_mOTU_760]"	0	0.0243702	0.00186818	0	0	0	0	0	0	0	0	0	0	0	0	0.00017313	0	0	0	0	0	0	0.00374566	0.0141359	0	0	0	0
88,"Prevotella albensis [ref_mOTU_v25_02388]"	0	0	0.000116761	9.86e-05	8.3e-05	0.000174469	0.000508699	0	9.02e-05	0	0.00744639	0.00624675	0.00111101	0.00263176	0	0.000605956	0.000156348	0.0125865	0.00732674	0.00341568	0.000299468	0	9.14e-05	9.36e-05	0.000575705	0.000669852	0.000382922	0.0007431
89,"unknown RC9 [rumen_mOTU_2265]"	0	0	0	0	0	0	0	0	0.00117265	0.00269058	0	0	0	0	0.000790826	0.0141101	0.0270482	0	0	0	0	0	0	0	0	0	0	0
90,"Lactobacillus amylovorus/kitasatonis [ref_mOTU_v25_03351]"	0	0	0	0	0	0	0	0	0	0	0	0	0	0	0	8.66e-05	0.00351782	0.000419551	0.0437095	0	0	0	0	0	0	0	0	0
91,"unknown Anaerovoracaceae [rumen_mOTU_769]"	0	0	0	0.000345253	4.15e-05	0.00895609	0.000508699	0	0	0.000298954	5.6e-05	0	0.0119433	0.000623312	0	0	7.82e-05	0.00142647	0.000100366	0.0161252	0.000748671	0	9.14e-05	0	0.000230282	0	0.00625439	0.000424628
92,"uncultured Methanobrevibacter sp. [rumen_mOTU_129]"	0.00264007	0.00827072	0.00712242	4.93e-05	0	0.000407095	0	0.000488162	9.02e-05	0.000199302	0	0	0.000185168	6.93e-05	0.000988533	0.00233726	0.00304878	4.2e-05	0	0.000317738	7.49e-05	0.00185874	0.0141604	0.00477439	0.000230282	4.47e-05	0.00121258	5.31e-05
93,"unknown Bacteroidales [rumen_mOTU_208]"	0.024054	0.00126271	0.000291903	0	0	0	0	0.00536978	0	0	5.6e-05	0	0	0	0.00158165	0	0	0	0	0	0	0.0162639	0	0	0	0	0	0
94,"Pseudomonas guguanensis/mendocina [ref_mOTU_v25_00238]"	0	6.31e-05	5.84e-05	9.86e-05	4.15e-05	0.00314045	0.00239088	0	0.000180408	9.97e-05	0.00223952	0.000173521	0.0122211	0.0165524	0	8.66e-05	7.82e-05	0.00146843	0.000552015	0.00103265	0.000673804	0	0.000182715	0.000561693	0.000172712	0.00116108	0.00127641	0.00605096
95,"unknown Prevotella [rumen_mOTU_733]"	0	0	0	0.0146979	0.0130372	0	0	0	0	0	0.0013997	0.00234253	0	0	0	0	0	0.00163625	0.000401465	0	0	0	0	0	0.00794473	0.00928862	0	0
96,"unknown Prevotella [rumen_mOTU_762]"	0	0.000820759	0.00560453	0	0	0	0	0	0.00333754	0.000896861	0	0	0	0	0.000197707	0.0336738	0.00555034	0	0	0	0	0	0.00036543	0.000468077	0	0	0	0
97,"unknown UBA1067 [rumen_mOTU_798]"	0.00352009	0.00239914	0.00216008	0	0	0	0	0.000976324	0.000721631	0.000398605	0	0	0	0	0.000790826	0.0128116	0.00226704	0	0	0	0	0.00232342	0.0159876	0.00720839	0	0	0	0
98,"unknown UBA1191 [rumen_mOTU_787]"	0	0	0	0	0	0	0	0.00219673	0.000541223	9.97e-05	0.0315212	0.00225577	0.00555504	0.000346284	0.00059312	0.000605956	7.82e-05	0.00234949	0.00015055	0.00524267	0.000299468	0	0	0	0	0	0	0
99,"unknown CAG-74 [rumen_mOTU_757]"	0	0.00284109	0.00192656	0	0	0	0	0	0.00577305	0.0116592	0	0	0	0	0.000197707	0.00839681	0.0068793	0	0	0	0	0.000464684	0.0103234	0.00692754	0	0	0	0
100,"unknown ISO4-G1 [rumen_mOTU_784]"	0.000880023	0.00208347	0.00256874	0.000295931	0	0.000116313	0	0.000244081	0.00541223	0.00478326	0.00845417	0.000520562	0.000277752	0.000138514	0.00197707	0.00865651	0.0158693	8.39e-05	0	7.94e-05	0	0.00139405	0.000182715	0.00131062	0.000115141	0	6.38e-05	0
101,"unknown UBA2918 [rumen_mOTU_750]"	0.000880023	0.0094703	0.00601319	0	0	0	0	0.00170857	0.00577305	0.00568012	0	0	0	0	0.00514037	0.0125519	0.00828643	8.39e-05	0	7.94e-05	0	0.00139405	0.000274073	9.36e-05	0	0	0	0
102,"unknown UBA1191 [rumen_mOTU_735]"	0.000293341	0.000441947	0.000116761	0.0125277	0.000498235	0.0101774	0.000457829	0.000244081	9.02e-05	0	0.000727843	8.68e-05	0.000370336	0.000138514	0.000395413	0.00017313	0	0.000335641	0	0.00150925	0.000149734	0	0.0060296	0.00748923	0.0137594	0.000267941	0.00153169	0.000106157
103,"unknown RC9 [rumen_mOTU_808]"	0.00264007	0.000378812	0.00116761	0.000147965	0	0.000116313	0	0.00414938	0.00171387	0.00169407	5.6e-05	0	0	0	0.00316331	0.00614612	0.00578487	8.39e-05	0	7.94e-05	0	0.00371747	0.0146172	0.0123572	0.000115141	0	6.38e-05	0
104,"unknown Bacteroidales [rumen_mOTU_33]"	0.00264007	0.00498769	0.00280226	4.93e-05	0	0	0	0.0012204	0.00856937	0.0124564	0	0	0	0	0.00059312	0.00701177	0.00117261	0	0	0	0	0.00325279	0.0117851	0.00187231	5.76e-05	0	6.38e-05	0
105,"unknown Bacteroidales [rumen_mOTU_205]"	0.013787	0.0110487	0.00957441	9.86e-05	0	0	0	0.00195265	0.00288652	0.004285	0	0	0	0	0.00158165	0.001991	0.00242339	8.39e-05	0	0.000158869	0	0.00185874	0.0066691	0.00102977	5.76e-05	0	0	0
106,"unknown Prevotellaceae [rumen_mOTU_526]"	0	0	5.84e-05	0.00942047	0.0182686	0	0	0	0	0	0	0	0	0	0	0	0	0.000881057	0.000752748	0	0	0	0	0	0.0141048	0.0161658	0	0
107,"unknown Anaerovibrio [rumen_mOTU_761]"	0	0.0010733	0.0124351	0	0	0	0	0.000244081	0.0022551	0.00338814	0	0	0	0	0	0.0196503	0.0169637	0	0	0	0	0	0.00036543	0.00337016	0	0	0	0
108,"Bacteria species incertae sedis [meta_mOTU_v25_12869]"	0	0	0	0	0	0	0	0	0	0	0.0238508	0.0327954	0	0	0	0	0	0	0.00160586	0	0	0	0	0	0.000748417	0.00098245	0	0
109,"unknown Enterococcaceae [rumen_mOTU_764]"	0	0	0	0	0	0.00977028	0.019941	0	0	0	0	0	0	0	0	0	0	0	0	0	0.0297971	0	0	0	0	0	0	0.00132696
110,"Kandleria vitulina [ref_mOTU_v25_04327]"	0	0.000378812	0.000583805	0.00414303	0.00556363	0.000581564	0.000305219	0	0.000721631	0.00876931	0.0113655	0.00286309	0.00166651	0.000415541	0	0.000692521	0.000781739	0.00201384	0.000200733	0.00246247	0.000299468	0	0.000274073	0.000468077	0.00685089	0.00714509	0.00178697	0.0007431
111,"unknown RUG563 [rumen_mOTU_2203]"	0.000880023	0.00909148	0.00636348	0	0	0	0	0.000244081	0.00992243	0.0177379	0	0	0	0	0.00118624	0.00640582	0.00226704	0	0	0	0	0.0027881	0.00347159	0.000842539	0	0	0	0
112,"unknown Prevotella [rumen_mOTU_778]"	0.000293341	0	0	0	0	0	0	0.000732243	0.009291	0.0120578	0	0	0	0	0.000395413	0.00190443	0.00132896	0	0	0	0	0.00325279	0.0146172	0.0179742	0	0	0	0
113,"unknown RUG563 [rumen_mOTU_782]"	0.000293341	0.00126271	0.00256874	0	0	5.82e-05	0	0.000732243	0.00865957	0.014848	0	0	0	0	0.00059312	0.00467451	0.00117261	0	0	0	0	0.000929368	0.0194592	0.0078637	0	0	0	0
114,"unknown RUG563 [rumen_mOTU_395]"	0.00117336	0.00252541	0.00227684	0	0	0	0	0.0012204	0.0161465	0.0158445	0	0	0	0	0.00158165	0.0074446	0.00257974	0	0	0	0	0.00139405	0.00401973	0.00954877	0	0	0	0
115,"uncultured Prevotella sp. [rumen_mOTU_227]"	0.00880024	0	0	0	0	0	0	0.0224555	0.000541223	0.000398605	0	0	0	0	0.0152234	0	7.82e-05	0	0	0	0	0.0185874	0	0	0	0	0	0
116,"unknown Bacteroidales [rumen_mOTU_655]"	0	0	0	0	0	0	0	0.000244081	0.0071261	0.0452417	0	0	0	0	0.000395413	0.00770429	0.00578487	0	0	0	0	0	0	0	0	0	0	0
117,"unknown Prevotella [rumen_mOTU_963]"	0.00410678	0.000505082	0.000525425	0	0	0	0	0.000244081	0.00604366	0.0178376	0	0	0	0	0.00771056	0.000865651	0.00187617	0	0	0	0	0.0134758	0.00721725	0.00645947	0	0	0	0
118,"unknown Oscillospiraceae [rumen_mOTU_2270]"	0	0	0	0	0	0	0	0	0	0	0	0	0	0	0	0	0	0.0668764	0.000100366	0	0	0	0	0	0	0	0	0
119,"Prevotella sp. KH2C16 [ref_mOTU_v25_10189]"	0	0	0	0.00621455	0.012705	0	0	0	0	0	0	0	0	0	0	0	0	0	0	0	0	0	0	0	0.0166379	0.0314384	0	0
120,"Prevotella sp. [ref_mOTU_v25_06406]"	0.00234673	0.00227287	0.011501	0	0.000622794	0	0	0.000488162	0.00739672	0.00239163	5.6e-05	0.00529238	0	0	0.00336101	0.0146295	0.00625391	4.2e-05	5.02e-05	0	0	0.00511152	0.00264937	0.00290208	0.000575705	0.00013397	0	0
121,"Acidaminococcus fermentans [ref_mOTU_v25_03588]"	0	6.31e-05	5.84e-05	0.0153391	0.0122068	0	0	0	0	0	0	0	0	0	0	0	0	0.00813929	0.0173634	0	0	0	0	0	0.0104778	0.00705578	0.000127641	0.000159236
122,"unknown ISO4-G1 [rumen_mOTU_729]"	0.000880023	0.0226024	0.0284897	0.00256473	8.3e-05	0.000116313	0	0	0	0	0.00106377	8.68e-05	0	0	0.000988533	0.000432825	0.000547217	8.39e-05	0	7.94e-05	0	0.000464684	0.0084049	0.00589777	0.000805987	4.47e-05	6.38e-05	0
123,"Prevotella sp. kh1p2 [ref_mOTU_v25_09340]"	0	0	0	0.00389642	0.00199294	0	0	0	0	0	0.0113655	0.0227312	0	0	0	0	0	0.0122928	0.00286044	0	0	0	0	0	0.00949914	0.00973519	0	0
124,"unknown UBA1066 [rumen_mOTU_703]"	0.00410678	0.000694488	0.00216008	0	0	0	0	0.00146449	0.00838896	0.0135526	0	0	0	0	0.00434954	0.0203428	0.0144622	0.00016782	0	0	0	0.00139405	0.00255801	0.00140423	0	0	0	0
125,"uncultured Prevotella sp. [rumen_mOTU_211]"	0.0228806	0.000505082	0.000817327	0	0	0	0	0.00585794	0.0069457	0.0113602	0	0	0	0	0.00691973	0.00579986	0.00789556	0	0	0	0	0.00697026	0.000182715	0.000187231	0	0	0	0
126,"uncultured Prevotella sp. [rumen_mOTU_190]"	0.0228806	0.000126271	5.84e-05	4.93e-05	0	0.000116313	0	0.00585794	0.00613386	0.00906826	0	0	0	0	0.00632661	0.00277008	0.00257974	4.2e-05	0	0	0	0.0209108	0.000548145	0.000187231	5.76e-05	0	0	0
127,"Lachnospiraceae bacterium NK3A20 [ref_mOTU_v25_12018]"	0	0.00258855	0.00642186	0.0266831	0.0176458	0	0	0	0	0	0	0	0	0	0	0	0	0	0	0	0	0	9.14e-05	9.36e-05	0.00857801	0.0199616	0	0
128,"unknown Anaerococcus [rumen_mOTU_771]"	0	0	0	0	0	0.00378017	0.00122088	0	0	0	0	0	0	0	0	0	0	0	0	0	0	0	0	0	0	0	0.0744783	0.00562633
129,"unknown Bacteroidales [rumen_mOTU_73]"	0.00733353	0.00189406	0.000350283	4.93e-05	0	0.000116313	0	0.000244081	0.000541223	0.00079721	0	0	0	0	0.0061289	0.00528047	0.00117261	4.2e-05	5.02e-05	0.000158869	0	0.0548327	0.00758268	0.000468077	0.000115141	0	0	0
130,"unknown Bacteroidales [rumen_mOTU_90]"	0	0.00113644	0.000116761	0	0	0	0	0	0	0	0	0	0	0	0	0	0	0	0	0	0	0	0.000182715	0.0879049	0	0	0	0
131,"unknown Prevotella [rumen_mOTU_498]"	0.0921091	0	0	4.93e-05	0	0	0	0.000488162	0	0	0	0	0	0	0.000988533	0.00017313	7.82e-05	4.2e-05	0	0	0	0.00185874	0	0	0	0	0	0
132,"unknown Prevotella [rumen_mOTU_730]"	0	6.31e-05	0	0.022688	0.0460868	0	0	0	0	0	0	0	0	0	0	8.66e-05	7.82e-05	0.0119572	0.000802931	0	0	0	9.14e-05	0	0.00949914	0.00732372	0	0
133,"unknown Olsenella_B [rumen_mOTU_288]"	0	0.000189406	0.000350283	0.0188409	0.0320947	0.000174469	0.000203479	0	0	0	0.00111976	0.0100642	0	0	0	8.66e-05	0.000156348	0.00549612	0.0134491	7.94e-05	0.000149734	0	0.000182715	0.000187231	0.00944157	0.00732372	0.000319101	0.000159236
134,"Olsenella umbonata [ref_mOTU_v25_06040]"	0	0.000378812	0.00221846	0.00221948	0.00726593	0.000639721	0.000254349	0	0.00108245	0.00149477	0.0204356	0.0187402	0.000185168	0.00186994	0	0.000519391	0.00343965	0.0122928	0.00712601	0.00373342	0.00194655	0	0.0023753	0.000280846	0.00759931	0.00334926	0.000510562	0.00106157
135,"Atopobiaceae species incertae sedis [meta_mOTU_v25_14133]"	0	0	0.000116761	0.00197287	0.0293544	0	0	0	0	0	0	0	0	0	0	0	0.000156348	0.0028949	0.00301099	0	0	0	9.14e-05	9.36e-05	0.011802	0.0547939	0.000127641	0.000106157
136,"unknown Bacteroidales [rumen_mOTU_91]"	0.000880023	0.0256329	0.0021017	0	0	0	0	0	0.000180408	0	0	0	0	0	0	8.66e-05	0	0	0	0	0	0.000464684	0.0768317	0.00102977	0	0	0	0
137,"unknown Prevotella [rumen_mOTU_783]"	0.00293341	0.000189406	0.000233522	0	0	0	0	0.00146449	0.0244452	0.0134529	0	0	0	0	0.00177936	0.000519391	0.000156348	0	0	0	0	0.00325279	0.0187283	0.0426886	0	0	0	0
138,"unknown Prevotella [rumen_mOTU_722]"	0.0234673	0.00423006	0.000350283	4.93e-05	0	0	0	0.00781059	0.0111853	0.00966617	0	0	0	0	0.00731514	0.00259695	0.00101626	4.2e-05	0	0	0	0.0130112	0.0158049	0.0150721	0	0	0	0
139,"unknown Selenomonadales [rumen_mOTU_578]"	0	0	0	0.010111	0.0629437	0	0	0	0	0	0	0	0	0	0	0	0	0	0	0	0	0	0	0	0.000575705	0.0380923	0	0
140,"unknown Prevotella [rumen_mOTU_736]"	0	0	0	0.0177559	0.000124559	0	0	0	0	0	0	0	0	0	0	0	0	0	0	0	0	0	0	0	0.0830743	0.0145135	0	0
141,"unknown Helcococcaceae [rumen_mOTU_773]"	0	0	0	0	0	0.00104682	0.0026961	0	0	0	0	0	0	0	0	0	0	0	0	0.000158869	0	0	0	0	0	0	0.0455039	0.0664013
142,"Prevotella sp. UBA2809 [rumen_mOTU_286]"	0.00234673	0.00208347	0.00303579	0	0	0	0	0.000732243	0.0069457	0.0114599	0	0	0	0	0.0150257	0.0231994	0.0168856	0.00016782	0	0	0	0.0111524	0.0100493	0.0127317	0	0	0	0
143,"Prevotella sp. UBA4376 [rumen_mOTU_270]"	0.00205339	0.00208347	0.0193823	0.0058693	0.00116255	0.000116313	0	0.000732243	0.00514162	0.00229198	0.0103578	0.00529238	9.26e-05	6.93e-05	0.00059312	0.001991	0.00164165	0.00809734	0.0240879	7.94e-05	0	0.00325279	0.0145259	0.00777008	0.00650547	0.00156299	6.38e-05	5.31e-05
144,"unknown Clostridia [rumen_mOTU_163]"	0.000880023	0.0010733	0.00163466	0.00128237	0.00876064	5.82e-05	0	0.00219673	0.00162367	0.000298954	0.0209955	0.0574354	0.000185168	0	0.000790826	0.000952216	0.00101626	0.0127963	0.00135495	0.000238303	7.49e-05	0.00185874	0.00118765	0.00140423	0.00259067	0.0098245	0.000127641	0
145,"unknown Lachnotalea [rumen_mOTU_763]"	0	0	0	0	0	0.0132597	0.00351002	0	0	0	0	0	0.00861031	0.0147517	0	0	0	0	0	0.0610851	0.014674	0	0	0	0	0	0.0114877	0.00647558
146,"Lactobacillus equicursoris [ref_mOTU_v25_03912]"	0	0.00208347	0.00274389	0.00123305	0.000871912	0.00244257	0.00585004	0	0	0	0	0	0	0	0	0.00701177	0.00484678	0.00809734	0.000301099	0.00103265	0.00142248	0	0.0116938	0.00861262	0.0284398	0.0370205	0.00280809	0.00796178
147,"Enterococcus sp. [ref_mOTU_v25_02783]"	0	0	0	0	0	0.00372201	0.00468003	0	0	0	0	0	0.0536987	0.0237551	0	0	0	0	0	0.0214473	0.0259789	0	0	0	0	0	0.00299955	0.00180467
148,"unknown RUG563 [rumen_mOTU_2259]"	0.000880023	0.00549277	0.0023936	0	0	0	0	0.000732243	0.0410428	0.0470354	0	0	0	0	0.00118624	0.0307306	0.00703565	0	0	0	0	0.00418216	0.00338023	0.00149785	0	0	0	0
149,"unknown Selenomonadales [rumen_mOTU_216]"	0.0190672	0.0113012	0.00595481	4.93e-05	0	0	0	0.0200146	0.0128089	0.00787245	0.000111976	0	9.26e-05	0	0.0118624	0.00805055	0.00453408	4.2e-05	0	0.000158869	0	0.0213755	0.0157135	0.00917431	0	0	0.000127641	0
150,"unknown Prevotella [rumen_mOTU_545]"	0	0.000189406	0.00227684	0.00503083	0.00220054	0.00081419	0.00142436	0	9.02e-05	0	0.0412071	0.0141419	0.00120359	0.00491724	0	0.000519391	0.000781739	0.0214391	0.0375872	0.0048455	0.000673804	0	0.00292344	0.00262123	0.00523892	0.00339392	0.00146787	0.00175159
151,"unknown Prevotella [rumen_mOTU_295]"	0.00938692	0.000883894	0.000350283	0	0	0	0	0.00146449	0.010193	0.0177379	0	0	0	0	0.00988533	0.0604224	0.0462007	0	0	0	0	0.0027881	0.000730861	0.000374462	0	0	0	0
152,"Lactobacillus crispatus [ref_mOTU_v25_04069]"	0	0	0	0	0	0	0.00010174	0	0.00856937	0.00866966	0.0317451	0.0392157	0.0431442	0.0513193	0	0	0	0	0	0	0	0	0	9.36e-05	0	0	0.000191461	0.0160297
153,"Bifidobacterium adolescentis [ref_mOTU_v25_02703]"	0	6.31e-05	0.00198494	0	0	0.00529224	0.00839353	0	0	0	0	0	0	0	0	0.00294321	0.00132896	0.04485	0.0476238	0	0.000823538	0	0.00319752	0.00131062	0.0507196	0.0314384	0.00510562	0.00987261
154,"unknown Anaerovoracaceae [rumen_mOTU_724]"	0	0	0	0.0962269	0.00128711	0	0.00015261	0	0	0	0	0	0	0	0	0	0	0.00113279	0.116425	0	0	0	0	0	0.000690846	0.00294735	0	0.000212314
155,"Lachnospira multipara/pectinoschiza [ref_mOTU_v25_03833]"	0	0.000378812	0.000817327	0.0212577	0.0088852	0.00558302	0.012107	0	0.00180408	0.000697559	0.0149488	0.0111921	0.0122211	0.0165524	0	0.000432825	0.000781739	0.0326411	0.0209264	0.0112797	0.00217115	0.000464684	9.14e-05	0.000280846	0.0131261	0.0100478	0.00548854	0.0214437
156,"unknown Clostridiales [rumen_mOTU_22]"	0.00821355	0.0388913	0.0266215	0.000197287	4.15e-05	0.000116313	0	0.00781059	0.0209273	0.0196313	0.000167964	0	0.000185168	0	0.0140372	0.0296053	0.0214196	0.0012167	5.02e-05	0.000158869	0	0.00371747	0.0151654	0.0177869	0.000115141	8.93e-05	6.38e-05	0
157,"Prevotella ruminicola [ref_mOTU_v25_03036]"	0.00704019	0.0166677	0.0116177	4.93e-05	0	0	0	0.00292897	0.0351795	0.0200299	0.00027994	0.00312337	0	0	0.0140372	0.0440616	0.0318168	0.000125865	0.000351282	7.94e-05	0	0.00604089	0.0268591	0.0164763	5.76e-05	0	0	0
158,"unknown UBA1764 [rumen_mOTU_753]"	0.000586682	0.00662921	0.00729757	4.93e-05	0	0.000232626	0	0	0.0111853	0.038565	0	0	0	0	0.00691973	0.0598165	0.0299406	0.00113279	5.02e-05	0.00158869	0.000149734	0.00139405	0.0380961	0.0588841	0.000115141	0	0.000127641	0
159,"Lactobacillus mucosae [ref_mOTU_v25_02550]"	0	0.00252541	0.00513749	0.0120345	0.0202201	0.00441989	0.00544308	0	0.022551	0.0246139	0.023011	0.029325	0.00388853	0.0125355	0	0.00666551	0.0117261	0.0215649	0.00878205	0.00659306	0.00419256	0	0.0128814	0.00430631	0.0150259	0.0112982	0.00453124	0.00886412
160,"unknown Bacteroidales [rumen_mOTU_157]"	0	0	0	0	0	0	0	0.000488162	0.115371	0.00936721	0	0	0	0	0.00138395	0.00285665	0.165494	0	0	0	0	0	0	0	0	0	0	0
161,"Olsenella umbonata [ref_mOTU_v25_06395]"	0	0.000126271	5.84e-05	0.0242663	0.0458792	0.00110497	0.000508699	0	9.02e-05	0	0.0398634	0.050321	0	0	0	0	7.82e-05	0.112314	0.0353791	0	0	0	9.14e-05	9.36e-05	0.0267127	0.00875273	0.00191461	0.000902335
162,"Lactobacillus agilis [ref_mOTU_v25_04375]"	0	0	0	0	0	0	0	0	0	0	0.0605789	0.158511	0.00620313	0.00893414	0	0	0	0.0143906	0.102123	0.000317738	0.00157221	0	0	0	0	0	0	0
163,"Lactobacillus salivarius [ref_mOTU_v25_00945]"	0	0	0	4.93e-05	0.000249118	0	0	0	0.00279632	0.00677628	0.0181961	0.0158771	0.0232386	0.0313734	0	0.00242382	0.0106316	0.0717432	0.0796407	0.044801	0.0685783	0	0	0	0	0	0	0
164,"Lactobacillus ruminis [ref_mOTU_v25_01239]"	0	0.0110487	0.00461206	0.0549938	0.0505294	0.00785112	0.0119036	0	0.000180408	0.00169407	0.018588	0.0096304	0.0017591	0.00263176	0	0.00268352	0.00336148	0.0294525	0.0341747	0.0379697	0.00973272	0	0.00548145	0.00327654	0.0322971	0.0288036	0.0100198	0.0131635
165,"unknown Anaerovoracaceae [rumen_mOTU_731]"	0	0.000189406	0.000116761	0.0777312	0.00141167	5.82e-05	5.09e-05	0.000244081	9.02e-05	9.97e-05	0.191983	0.0322749	0	0	0	8.66e-05	0.000156348	0.0424166	0.0337231	0.000158869	0	0	9.14e-05	9.36e-05	0.00932642	0.0703345	6.38e-05	5.31e-05
166,"Proteus mirabilis/vulgaris [ref_mOTU_v25_02513]"	0	0	0	0	0	0.224251	0.0339302	0	0	0	0	0	0	0	0	0	0	4.2e-05	0.00175641	0.151084	0.0208131	0	0	0	0	0	0.123173	0.0222399
167,"Bacteroidales bacterium Bact_22 [ref_mOTU_v25_09007]"	0	0.248942	0.339191	0	0	0	0	0	0	0	0	0	0	0	0	0	0	0	0	0	0	0	0	0	0	0	0	0
168,"Globicatella sanguinis/sulfidifaciens [ref_mOTU_v25_02265]"	0	0	0	0	0	0.0707764	0.1959	0	0	0	0	0	0.00046292	0.0333126	0	0	0	0	0	0	0.00291982	0	0	0	5.76e-05	0	0.0957942	0.191401
169,"Prevotella bryantii [ref_mOTU_v25_03809]"	0.000880023	0.00296736	0.0258042	0.0340321	0.0114594	0.000465252	0.00010174	0.000244081	0.0257081	0.0361734	0.0816864	0.130401	0.00194426	0.00339359	0.000395413	0.0302112	0.0213415	0.0868471	0.0614242	0.00174756	0.000598937	0.00371747	0.0105061	0.0102041	0.056707	0.0146921	0.000127641	0
170,"unknown Alkaliphilus [rumen_mOTU_765]"	0	0	0	4.93e-05	8.3e-05	0.169584	0.0323532	0	0	0	0.000391915	0.000173521	0.17915	0.0448785	0	0	0	0.000629327	0.0012044	0.260227	0.0734446	0	0	0	0.000345423	0.000535882	0.0708405	0.00764331
171,"Enterococcus gallinarum/saccharolyticus [ref_mOTU_v25_03214]"	0	0	0	0.000295931	8.3e-05	0.11451	0.194374	0	0	0	0	0	0.186835	0.114897	0	0	0	0.000419551	0.00165605	0.0792756	0.0633376	0	0	0	5.76e-05	0.000223284	0.100772	0.118047
172,"unknown Prevotella [rumen_mOTU_728]"	0	0.0182461	0.0158211	0.2836	0.291717	5.82e-05	0	0	0	0	0	0	0	0	0	0.000259695	0.0182927	0.102538	0.0630802	0	0	0	0.0251233	0.0171316	0.256477	0.238869	0	0
173,"Streptococcus equinus [ref_mOTU_v25_00901]"	0.000293341	0.0227918	0.0433767	0.0204192	0.0186423	0.140448	0.100214	0.000244081	0.0432076	0.0292975	0.0428307	0.0223842	0.133043	0.0934275	0.000395413	0.0182652	0.0404941	0.0471156	0.0367341	0.0984193	0.0617654	0	0.0178147	0.0451226	0.0442717	0.0455053	0.119791	0.125159
174,"Megasphaera elsdenii [ref_mOTU_v25_01516]"	0	0.0210241	0.0204916	0.0238224	0.0653104	0.0704275	0.091464	0	0.0485297	0.00767314	0.114495	0.100469	0.0348116	0.147656	0	0.00623269	0.005394	0.0839102	0.0725147	0.0675193	0.0869956	0	0.0416591	0.026774	0.0789292	0.0702452	0.100198	0.112473
175,"Enterococcus avium [ref_mOTU_v25_02620]"	0	0	0	4.93e-05	4.15e-05	0.0246002	0.205769	0	0	0	5.6e-05	0	0.218221	0.277997	0	0	0	0	0.000100366	0.0496465	0.477428	0	0	0	5.76e-05	4.47e-05	0.149403	0.171868
Supplementary Table S3 The relative abundance overview at species level for all taxa with 1% abundance or more in one or more sample

## Sheet: Supplementary Table S4
Taxonomy	mOTUs cluster	baseMean	log2FoldChange	lfcSE	p-value	padj
unknown Clostridiales	rumen_mOTU_22	236.74	-6.98	1.31	<0.001	<0.001
unknown Anaerovoracaceae	rumen_mOTU_731	482.46	9.48	1.9	<0.001	<0.001
uncultured Methanobrevibacter sp.	rumen_mOTU_129	30.07	-7.31	1.46	<0.001	<0.001
Succiniclasticum ruminis	ref_mOTU_v25_11146	56.05	-6.91	1.6	<0.001	<0.001
unknown Selenomonadales	rumen_mOTU_216	143.8	-7.48	1.97	<0.001	<0.001
unknown Bacteroidales	rumen_mOTU_33	72.53	-9.96	2.15	<0.001	<0.001
unknown RUG563	rumen_mOTU_782	73.05	-13.25	4.08	<0.001	<0.001
unknown RUG563	rumen_mOTU_2259	254.08	-15.18	4.6	<0.001	<0.001
unknown RUG563	rumen_mOTU_395	98.27	-13.81	4.29	<0.001	<0.001
unknown RC9	rumen_mOTU_808	41.05	-6.21	1.52	<0.001	<0.001
unknown UBA1067	rumen_mOTU_798	32.02	-12.21	3.94	<0.001	<0.001
unknown Selenomonadales	rumen_mOTU_1690	45.15	-7.11	2	<0.001	<0.001
unknown Prevotella	rumen_mOTU_722	119.14	-9.66	2.34	<0.001	<0.001
unknown RUG563	rumen_mOTU_2203	89.36	-13.22	4.33	<0.001	<0.001
unknown Clostridiales	rumen_mOTU_700	24.97	-11.99	3.99	<0.001	<0.001
unknown UBA4372	rumen_mOTU_746	22.9	-8.53	2.19	<0.001	<0.001
unknown RC9	rumen_mOTU_497	21.52	-11.11	3.86	<0.001	<0.001
unknown RUG440	rumen_mOTU_2221	42.92	-9.11	2.51	<0.001	<0.001
unknown RC9	rumen_mOTU_426	23.48	-11.01	3.9	<0.001	<0.001
Prevotella sp. UBA2809	rumen_mOTU_286	115.88	-8.68	2.33	<0.001	<0.001
unknown UBA2918	rumen_mOTU_750	66.29	-9.19	2.55	<0.001	<0.001
unknown Bacteroidales	rumen_mOTU_205	63.96	-7.49	2.03	<0.001	<0.001
unknown Clostridiales	rumen_mOTU_203	24.85	-5.4	1.62	<0.001	<0.001
unknown Ruminiclostridium_C	rumen_mOTU_749	22.2	-11.68	4.26	<0.001	<0.001
unknown Bacteroidales	rumen_mOTU_73	55.31	-6.99	1.93	<0.001	<0.001
Olsenella umbonata	ref_mOTU_v25_06395	215.27	7.59	2.32	<0.001	<0.001
unknown UBA1066	rumen_mOTU_596	51.15	-11.82	4.35	<0.001	<0.001
Selenomonas sp. AE3005	ref_mOTU_v25_03814	23.59	-7.91	2.29	<0.001	<0.001
unknown RC9	rumen_mOTU_612	25.76	-8.58	2.61	<0.001	<0.001
unknown RC9	rumen_mOTU_1173	21.02	-6.46	1.86	<0.001	<0.001
unknown Prevotella	rumen_mOTU_296	12.96	-10.28	3.91	<0.001	<0.001
unknown Prevotella	rumen_mOTU_2298	34.74	-11.73	4.48	<0.001	<0.001
unknown Clostridiales	rumen_mOTU_44	27.82	-5.81	1.69	<0.001	<0.001
unknown UBA1764	rumen_mOTU_753	248.68	-7.2	2.12	<0.001	<0.001
unknown UBA3624	rumen_mOTU_992	13.55	-10.34	3.99	<0.001	<0.001
unknown Clostridiales	rumen_mOTU_234	27.57	-7.64	2.4	<0.001	<0.001
unknown UBA1066	rumen_mOTU_703	101.73	-8.35	2.68	<0.001	<0.001
uncultured Prevotella sp.	rumen_mOTU_211	108.27	-11.92	4.76	<0.001	<0.001
unknown Spirochaetaceae	rumen_mOTU_840	12.15	-10.71	4.25	<0.001	<0.001
Prevotella sp.	ref_mOTU_v25_06406	74.71	-6.47	2.49	<0.001	<0.001
uncultured Prevotella sp.	rumen_mOTU_190	96.84	-7.9	2.68	<0.001	<0.001
unknown Lentisphaerae	rumen_mOTU_506	16.16	-10.15	4.11	<0.001	<0.001
unknown RC9	rumen_mOTU_472	22.18	-7.91	2.72	<0.001	<0.001
unknown RUG440	rumen_mOTU_802	19.91	-5.39	2.88	<0.001	<0.001
unknown Clostridiales	rumen_mOTU_511	20.07	-8.1	2.83	<0.001	<0.001
unknown UBA4372	rumen_mOTU_2194	13.53	-8.12	2.95	<0.001	<0.001
unknown UBA9732	rumen_mOTU_741	11.1	-6.9	2.45	<0.001	<0.001
Prevotella ruminicola	ref_mOTU_v25_03036	275.93	-6.41	2.63	<0.001	0.001386
unknown Bacteroidales	rumen_mOTU_371	14.85	-9.71	4.3	<0.001	0.001404
Anaerovibrio lipolyticus	ref_mOTU_v25_02119	10.67	-9.62	4.37	<0.001	0.001695
unknown Clostridiales	rumen_mOTU_851	17.65	-6.16	2.33	<0.001	0.001695
unknown RUG658	rumen_mOTU_952	8.1	-9.61	4.4	<0.001	0.001774
unknown UBA2856	rumen_mOTU_809	16.02	-6.63	2.63	<0.001	0.002006
Succiniclasticum ruminis	ref_mOTU_v25_07090	8.15	-8.22	3.74	<0.001	0.002262
uncultured Methanobrevibacter sp.	rumen_mOTU_245	36.7	-4.92	2.63	<0.001	0.002342
unknown Prevotella	rumen_mOTU_545	136.64	4.99	1.89	<0.001	0.002519
unknown Bacteroidales	rumen_mOTU_92	6.92	-8.56	4.06	<0.001	0.002876
unknown UBA2862	rumen_mOTU_1365	11.67	-6.35	2.77	<0.001	0.003223
unknown RUG695	rumen_mOTU_1967	7.22	-8.6	4.21	<0.001	0.00334
unknown Bacteroidales	rumen_mOTU_2283	9.87	-6.97	3.71	<0.001	0.004283
unknown UBA1067	rumen_mOTU_1411	10.92	-7.88	3.98	<0.001	0.004521
unknown UBA4263	rumen_mOTU_1111	8.57	-8.25	4.27	<0.001	0.004746
unknown UBA3796	rumen_mOTU_1234	6.04	-8.36	4.41	<0.001	0.004746
uncultured Methanobrevibacter sp.	rumen_mOTU_235	8.45	-4.83	2.13	<0.001	0.004821
unknown UBA2862	rumen_mOTU_413	6.02	-8.02	4.26	<0.001	0.005227
uncultured Sutterella sp.	rumen_mOTU_27	10.03	-5.86	2.91	<0.001	0.00526
unknown UBA2862	rumen_mOTU_399	6.7	-5.66	2.78	<0.001	0.00526
unknown UBA1407	rumen_mOTU_407	7.94	-7.83	4.05	<0.001	0.00526
Bacteroides sp.	ref_mOTU_v25_04316	5.19	-8.16	4.51	<0.001	0.005499
unknown UBA1179	rumen_mOTU_316	6.19	-7.53	3.91	<0.001	0.005599
unknown Mogibacterium	rumen_mOTU_1796	5.38	-7.94	4.31	<0.001	0.005726
unknown UBA2862	rumen_mOTU_408	8.37	-5.3	2.75	<0.001	0.005908
unknown Clostridiales	rumen_mOTU_1648	5.85	-7.74	4.29	<0.001	0.006079
unknown RUG440	rumen_mOTU_1175	15.88	-2.48	5	0.001037	0.006957
unknown Olsenella_B	rumen_mOTU_288	34.56	3.89	1.72	0.001145	0.007414
unknown UBA2862	rumen_mOTU_1339	5.41	-7.44	4.22	0.001146	0.007414
unknown CAG-307	rumen_mOTU_2187	6.93	-5.2	3.04	0.001238	0.007939
unknown Mogibacterium	rumen_mOTU_1266	19.7	-3.54	2.67	0.001258	0.007997
unknown QANA01	rumen_mOTU_1440	3.67	-7.19	4.15	0.00142	0.008797
unknown UBA2862	rumen_mOTU_2070	3.82	-6.95	4.33	0.001765	0.010488
unknown UBA3636	rumen_mOTU_315	8.42	-6.68	3.99	0.002014	0.011539
unknown Pseudobutyrivibrio	rumen_mOTU_732	19.29	4.62	2.72	0.002305	0.012525
unknown Methanobrevibacter_A	rumen_mOTU_1005	5.3	-2.05	3.19	0.002303	0.012525
Catabacter sp. UBA2862	rumen_mOTU_417	5.51	-4.77	3.26	0.002389	0.012839
Butyrivibrio sp. AE2015	ref_mOTU_v25_03789	39.04	3.62	8.32	0.002679	0.014191
unknown Eubacterium_E	rumen_mOTU_726	7.18	5.92	4.12	0.002781	0.014625
unknown Clostridiales	rumen_mOTU_187	9.4	-2.68	1.85	0.003969	0.018598
unknown Selenomonas_A	rumen_mOTU_620	23.36	-2.75	1.93	0.004292	0.019733
unknown Clostridiales	rumen_mOTU_23	6.01	-3.38	3.01	0.005289	0.02315
unknown Methanobrevibacter_A	rumen_mOTU_246	2.26	-3.96	3.4	0.006053	0.025875
Selenomonas ruminantium	ref_mOTU_v25_03813	9.92	-2.32	2.49	0.008527	0.034205
Supplementary Table S4 Differential abundance between control d10 and Choline chloride d10.
Base mean: mean of normalized counts of all samples. log2FoldChange: log2 fold change of control. P value: Wald test. Padj: adjusted P value of Benjamini-Hochberg test.
All mOTUs clusters that met the criteria of Benjamini-Hochberg padj ≤0.05, Wald test p≤0.05 and log2FoldChange ≥2 are listed here.
All positive log2FoldChanges have been highlighted.

## Sheet: Supplementary Table S5
Taxonomy	mOTUs cluster	baseMean	log2FoldChange	lfcSE	p-value	padj
unknown Clostridiales	rumen_mOTU_22	236.74	-11.96	1.65	<0.001	<0.001
unknown RC9	rumen_mOTU_808	41.05	-14.96	4.01	<0.001	<0.001
uncultured Methanobrevibacter sp.	rumen_mOTU_129	30.07	-11.95	2.17	<0.001	<0.001
Succiniclasticum ruminis	ref_mOTU_v25_11146	56.05	-14.27	4.03	<0.001	<0.001
unknown Selenomonadales	rumen_mOTU_216	143.8	-15.67	4.4	<0.001	<0.001
unknown UBA1764	rumen_mOTU_753	248.68	-12.86	2.6	<0.001	<0.001
unknown Bacteroidales	rumen_mOTU_33	72.53	-15.47	4.6	<0.001	<0.001
unknown UBA4372	rumen_mOTU_746	22.9	-13.96	4.28	<0.001	<0.001
unknown Bacteroidales	rumen_mOTU_205	63.96	-14.78	4.57	<0.001	<0.001
Prevotella sp. UBA2809	rumen_mOTU_286	115.88	-16.01	4.99	<0.001	<0.001
unknown RUG563	rumen_mOTU_782	73.05	-15.5	4.86	<0.001	<0.001
unknown Selenomonadales	rumen_mOTU_1690	45.15	-13.55	4.22	<0.001	<0.001
unknown Clostridiales	rumen_mOTU_187	9.4	-12.57	3.97	<0.001	<0.001
Lachnospiraceae bacterium FE2018	ref_mOTU_v25_08199	21.83	-14.31	4.61	<0.001	<0.001
unknown Prevotella	rumen_mOTU_722	119.14	-14.97	4.84	<0.001	<0.001
unknown RUG440	rumen_mOTU_2221	42.92	-14.49	4.72	<0.001	<0.001
unknown RUG563	rumen_mOTU_2259	254.08	-16.59	5.6	<0.001	<0.001
unknown Clostridiales	rumen_mOTU_44	27.82	-12.41	4.06	<0.001	<0.001
unknown RUG563	rumen_mOTU_395	98.27	-15.35	5.18	<0.001	<0.001
Selenomonas sp. AE3005	ref_mOTU_v25_03814	23.59	-13.74	4.59	<0.001	<0.001
unknown UBA1066	rumen_mOTU_703	101.73	-15.53	5.34	<0.001	<0.001
unknown RUG563	rumen_mOTU_2203	89.36	-15.39	5.29	<0.001	<0.001
unknown RC9	rumen_mOTU_1173	21.02	-12.5	4.15	<0.001	<0.001
unknown UBA2918	rumen_mOTU_750	66.29	-14.81	5.07	<0.001	<0.001
unknown UBA2856	rumen_mOTU_809	16.02	-13.6	4.6	<0.001	<0.001
unknown RC9	rumen_mOTU_426	23.48	-13.77	4.7	<0.001	<0.001
unknown Clostridiales	rumen_mOTU_203	24.85	-11.56	3.87	<0.001	<0.001
unknown Clostridiales	rumen_mOTU_234	27.57	-13.78	4.75	<0.001	<0.001
unknown RC9	rumen_mOTU_612	25.76	-13.54	4.8	<0.001	<0.001
unknown RC9	rumen_mOTU_497	21.52	-13.14	4.62	<0.001	<0.001
uncultured Prevotella sp.	rumen_mOTU_190	96.84	-14.33	5.17	<0.001	<0.001
uncultured Methanobrevibacter sp.	rumen_mOTU_235	8.45	-11.98	4.17	<0.001	<0.001
unknown Prevotella	rumen_mOTU_295	199.69	-15.98	5.95	<0.001	<0.001
unknown UBA1067	rumen_mOTU_798	32.02	-12.98	4.65	<0.001	<0.001
unknown UBA1066	rumen_mOTU_596	51.15	-14.47	5.36	<0.001	<0.001
unknown Prevotella	rumen_mOTU_963	83.43	-14.91	5.59	<0.001	<0.001
unknown Clostridiales	rumen_mOTU_851	17.65	-12.7	4.56	<0.001	<0.001
unknown CAG-74	rumen_mOTU_757	65.64	-14.62	5.62	<0.001	<0.001
unknown UBA1412	rumen_mOTU_2251	37.32	-14.24	5.47	<0.001	<0.001
unknown Clostridiales	rumen_mOTU_700	24.97	-12.78	4.78	<0.001	<0.001
unknown RUG440	rumen_mOTU_802	19.91	-12.61	4.72	<0.001	<0.001
unknown Mogibacterium	rumen_mOTU_1266	19.7	-5.81	3.13	<0.001	<0.001
uncultured Methanobrevibacter sp.	rumen_mOTU_245	36.7	-9.16	2.59	<0.001	<0.001
unknown Prevotella	rumen_mOTU_783	121.54	-14.48	5.9	<0.001	<0.001
uncultured Prevotella sp.	rumen_mOTU_211	108.27	-14.24	5.84	<0.001	<0.001
unknown Bacteroidales	rumen_mOTU_73	55.31	-7.47	2.45	<0.001	<0.001
unknown RC9	rumen_mOTU_472	22.18	-12.01	4.86	<0.001	<0.001
unknown UBA2862	rumen_mOTU_1365	11.67	-11.62	4.68	<0.001	<0.001
unknown UBA1191	rumen_mOTU_723	28.84	-5.11	2.05	<0.001	<0.001
Olsenella umbonata	ref_mOTU_v25_06395	215.27	7.88	2.29	<0.001	<0.001
unknown Prevotella	rumen_mOTU_296	12.96	-11.48	4.77	<0.001	<0.001
unknown ISO4-G1	rumen_mOTU_729	48.96	-6.33	3.08	<0.001	<0.001
unknown GCA-900199385	rumen_mOTU_795	38.65	-12.83	5.64	<0.001	<0.001
unknown Clostridiales	rumen_mOTU_23	6.01	-10.83	4.4	<0.001	<0.001
unknown ISO4-G1	rumen_mOTU_752	21.68	-7	2.26	<0.001	<0.001
unknown Methanobrevibacter_A	rumen_mOTU_1699	4.96	-10.76	4.34	<0.001	<0.001
unknown Bacteroidales	rumen_mOTU_371	14.85	-12.07	5.29	<0.001	<0.001
unknown Clostridiales	rumen_mOTU_511	20.07	-11.66	5.04	<0.001	<0.001
unknown UBA9732	rumen_mOTU_741	11.1	-11.05	4.67	<0.001	<0.001
unknown UBA1407	rumen_mOTU_407	7.94	-11.2	4.9	<0.001	<0.001
unknown UBA1179	rumen_mOTU_316	6.19	-10.84	4.71	<0.001	<0.001
unknown RUG440	rumen_mOTU_1175	15.88	-10.67	4.59	<0.001	<0.001
unknown Ruminiclostridium_C	rumen_mOTU_749	22.2	-11.57	5.29	<0.001	<0.001
unknown Prevotella	rumen_mOTU_2298	34.74	-11.92	5.59	<0.001	<0.001
unknown Prevotella	rumen_mOTU_801	26.65	-11.84	5.53	<0.001	<0.001
unknown Eubacterium_Q	rumen_mOTU_674	16.56	-10.59	4.04	<0.001	<0.001
unknown UBA2862	rumen_mOTU_399	6.7	-10.44	4.59	<0.001	<0.001
unknown UBA3624	rumen_mOTU_992	13.55	-10.78	4.93	<0.001	<0.001
unknown UBA4263	rumen_mOTU_1111	8.57	-11.09	5.18	<0.001	<0.001
unknown UBA636	rumen_mOTU_2287	19.92	-11.86	5.86	<0.001	<0.001
unknown Clostridiales	rumen_mOTU_367	13.48	-11.56	5.61	<0.001	<0.001
uncultured Sutterella sp.	rumen_mOTU_27	10.03	-10.43	4.76	<0.001	<0.001
unknown Anaerovoracaceae	rumen_mOTU_731	482.46	5.88	2.01	<0.001	<0.001
unknown Prevotella	rumen_mOTU_268	14.39	-11.59	5.77	<0.001	<0.001
unknown UBA2862	rumen_mOTU_408	8.37	-10.38	4.75	<0.001	<0.001
unknown UBA1777	rumen_mOTU_2262	14.08	-11.77	5.94	<0.001	<0.001
unknown Succiniclasticum	rumen_mOTU_601	10.45	-10.34	4.75	<0.001	<0.001
unknown UBA3636	rumen_mOTU_315	8.42	-10.24	4.72	<0.001	<0.001
unknown Methanobrevibacter_A	rumen_mOTU_1005	5.3	-9.67	4.26	<0.001	<0.001
unknown CAG-307	rumen_mOTU_2187	6.93	-10.47	4.94	<0.001	<0.001
Catabacter sp. UBA2862	rumen_mOTU_417	5.51	-10.17	4.73	<0.001	<0.001
Fibrobacter succinogenes	ref_mOTU_v25_05981	24.5	-11.08	5.53	<0.001	<0.001
unknown Prevotella	rumen_mOTU_333	15.97	-11.35	5.8	<0.001	<0.001
unknown RUG695	rumen_mOTU_1967	7.22	-10.65	5.19	<0.001	<0.001
unknown Eggerthellaceae	rumen_mOTU_2296	5.81	-10.68	5.18	<0.001	<0.001
Anaerovibrio lipolyticus	ref_mOTU_v25_02119	10.67	-10.71	5.44	<0.001	0.00115
uncultured Prevotella sp.	rumen_mOTU_206	16.84	-11.15	5.85	<0.001	0.00115
unknown Lentisphaerae	rumen_mOTU_506	16.16	-10.37	5.15	<0.001	0.00116
Succiniclasticum ruminis	ref_mOTU_v25_07090	8.15	-9.64	4.61	<0.001	0.00145
unknown Olsenella_B	rumen_mOTU_288	34.56	4.53	1.58	<0.001	0.00151
unknown UBA4372	rumen_mOTU_2194	13.53	-10.21	5.29	<0.001	0.0016
unknown Mailhella	rumen_mOTU_1495	6.23	-10.19	5.63	<0.001	0.00215
Selenomonas ruminantium	ref_mOTU_v25_03813	9.92	-4.98	2.12	<0.001	0.00225
unknown Bacteroidales	rumen_mOTU_92	6.92	-9.61	5.09	<0.001	0.00251
unknown Mogibacterium	rumen_mOTU_1796	5.38	-9.6	5.3	<0.001	0.00291
uncultured Prevotella sp.	rumen_mOTU_121	7.61	-9.43	5.19	<0.001	0.00309
unknown UBA3796	rumen_mOTU_1234	6.04	-9.6	5.45	<0.001	0.00309
unknown UBA2862	rumen_mOTU_1339	5.41	-9.35	5.15	<0.001	0.0031
unknown UBA2862	rumen_mOTU_413	6.02	-9.42	5.27	<0.001	0.00315
unknown Bact-11	rumen_mOTU_300	8.29	-9.69	5.96	<0.001	0.00373
unknown UBA1191	rumen_mOTU_810	7.35	-6.51	3.28	<0.001	0.00373
unknown UBA2862	rumen_mOTU_2070	3.82	-9.03	5.18	<0.001	0.00408
unknown UBA2862	rumen_mOTU_679	4.12	-9.19	5.55	<0.001	0.00424
unknown Clostridiales	rumen_mOTU_909	7.42	-9.3	6.07	<0.001	0.00474
unknown Clostridiales	rumen_mOTU_1648	5.85	-8.83	5.35	0.00101	0.00507
unknown UBA1067	rumen_mOTU_1411	10.92	-8.68	5.02	0.00103	0.00515
unknown Erysipelotrichaceae	rumen_mOTU_135	5.5	-8.58	5.09	0.00117	0.00571
unknown UBA1066	rumen_mOTU_427	5.01	-8.49	6.25	0.00167	0.00777
unknown UBA2862	rumen_mOTU_1349	4.55	-8.46	6.07	0.00167	0.00777
unknown QANA01	rumen_mOTU_1440	3.67	-8.28	5.2	0.00177	0.00804
unknown UBA1191	rumen_mOTU_735	16.37	-2.21	2.41	0.00695	0.0255
unknown Selenomonas_A	rumen_mOTU_620	23.36	-2.12	2.13	0.00856	0.0294
unknown Methanobrevibacter_A	rumen_mOTU_246	2.26	-6.2	5.23	0.00952	0.0316
Supplementary Table S5 Differential abundance between control d15 and Choline chloride d15.
Base mean: mean of normalized counts of all samples. log2FoldChange: log2 fold change of control. P value: Wald test. Padj: adjusted P value of Benjamini-Hochberg test.
All mOTUs clusters that met the criteria of Benjamini-Hochberg padj ≤0.05, Wald test p≤0.05 and log2FoldChange ≥2 are listed here.
All positive log2FoldChanges have been highlighted.

## Sheet: Supplementary Table S6
Taxonomy	mOTUs cluster	baseMean	log2FoldChange	lfcSE	p-value	padj
unknown Clostridiales	rumen_mOTU_22	236.744	-7.89225	1.37143	<0.001	<0.001
unknown Alkaliphilus	rumen_mOTU_765	491.14	14.5464	3.54214	<0.001	<0.001
Enterococcus gallinarum/saccharolyticus	ref_mOTU_v25_03214	407.663	14.0063	3.5261	<0.001	<0.001
Enterococcus avium	ref_mOTU_v25_02620	769.584	13.8916	3.68557	<0.001	<0.001
unknown Selenomonadales	rumen_mOTU_1690	45.1502	-10.4884	3.51276	<0.001	<0.001
Prevotella ruminicola	ref_mOTU_v25_03036	275.925	-10.1449	2.63861	<0.001	<0.001
unknown Prevotella	rumen_mOTU_722	119.142	-11.3285	3.87154	<0.001	<0.001
Succiniclasticum ruminis	ref_mOTU_v25_11146	56.0504	-6.47302	1.61789	<0.001	<0.001
unknown RUG563	rumen_mOTU_2259	254.077	-12.978	4.3583	<0.001	<0.001
unknown Bacteroidales	rumen_mOTU_33	72.5328	-8.93385	2.27812	<0.001	<0.001
unknown Selenomonadales	rumen_mOTU_216	143.802	-6.93201	1.77419	<0.001	<0.001
Prevotella sp. UBA2809	rumen_mOTU_286	115.876	-11.2564	3.93886	<0.001	<0.001
unknown RUG563	rumen_mOTU_395	98.2679	-11.561	4.06475	<0.001	<0.001
Prevotella sp.	ref_mOTU_v25_06406	74.7117	-11.0328	3.91166	<0.001	<0.001
unknown Selenomonas_A	rumen_mOTU_620	23.363	-7.02753	2.10093	<0.001	<0.001
unknown RC9	rumen_mOTU_808	41.0521	-5.89182	1.49688	<0.001	<0.001
unknown UBA1067	rumen_mOTU_798	32.0246	-9.90608	3.71115	<0.001	<0.001
unknown UBA4372	rumen_mOTU_746	22.8974	-8.89675	3.42037	<0.001	<0.001
unknown RUG563	rumen_mOTU_782	73.0521	-8.70799	2.49551	<0.001	<0.001
unknown Clostridiales	rumen_mOTU_203	24.8547	-6.05257	1.74266	<0.001	<0.001
unknown RUG563	rumen_mOTU_2203	89.3575	-10.947	4.11156	<0.001	<0.001
unknown Anaerovoracaceae	rumen_mOTU_769	28.8333	8.30369	2.40449	<0.001	<0.001
unknown UBA1066	rumen_mOTU_703	101.735	-10.9481	4.15076	<0.001	<0.001
unknown RUG440	rumen_mOTU_2221	42.9212	-9.59688	3.72681	<0.001	<0.001
unknown Clostridiales	rumen_mOTU_700	24.9662	-9.67259	3.77646	<0.001	<0.001
Prevotella sp. UBA4376	rumen_mOTU_270	91.6533	-5.84344	1.72317	<0.001	<0.001
unknown Prevotella	rumen_mOTU_783	121.544	-11.5822	4.54976	<0.001	<0.001
Selenomonas sp. AE3005	ref_mOTU_v25_03814	23.5931	-8.93369	3.62844	<0.001	<0.001
unknown UBA2918	rumen_mOTU_750	66.285	-7.58077	2.72738	<0.001	<0.001
unknown Clostridiales	rumen_mOTU_234	27.5668	-9.07536	3.7318	<0.001	<0.001
unknown RC9	rumen_mOTU_612	25.7639	-9.11973	3.77054	<0.001	<0.001
unknown RUG440	rumen_mOTU_802	19.9086	-8.93538	3.71573	<0.001	<0.001
unknown Clostridiales	rumen_mOTU_44	27.8167	-5.91983	1.86984	<0.001	<0.001
Selenomonas ruminantium	ref_mOTU_v25_03813	9.91978	-7.96326	3.42492	<0.001	<0.001
unknown RC9	rumen_mOTU_426	23.4827	-8.6297	3.69421	<0.001	<0.001
unknown Bacteroidales	rumen_mOTU_205	63.96	-6.11553	2.19734	<0.001	<0.001
unknown Ruminiclostridium_C	rumen_mOTU_749	22.1951	-9.30901	4.06634	<0.001	0.001154
unknown UBA1066	rumen_mOTU_596	51.1465	-9.44525	4.16782	<0.001	0.001241
unknown RC9	rumen_mOTU_1173	21.0232	-5.63192	1.97212	<0.001	0.001707
unknown Prevotella	rumen_mOTU_2298	34.7431	-9.32846	4.31037	<0.001	0.001836
unknown Clostridiales	rumen_mOTU_511	20.0664	-8.49192	3.91029	<0.001	0.00189
unknown UBA9732	rumen_mOTU_741	11.1013	-7.87491	3.67143	<0.001	0.002062
unknown RC9	rumen_mOTU_497	21.5191	-6.53558	2.49677	<0.001	0.002069
Selenomonas ruminantium	ref_mOTU_v25_04248	41.3925	-6.37233	2.97399	<0.001	0.002157
unknown UBA4372	rumen_mOTU_2194	13.5334	-8.53015	4.01469	<0.001	0.00219
uncultured Prevotella sp.	rumen_mOTU_211	108.27	-9.51015	4.61146	<0.001	0.002326
unknown Prevotella	rumen_mOTU_296	12.9636	-7.81987	3.73211	<0.001	0.002501
unknown UBA3624	rumen_mOTU_992	13.5506	-7.86931	3.82479	<0.001	0.00282
uncultured Prevotella sp.	rumen_mOTU_190	96.8392	-6.73135	2.77917	<0.001	0.002857
unknown Lentisphaerae	rumen_mOTU_506	16.1648	-7.63536	3.98596	<0.001	0.004658
Selenomonas ruminantium	ref_mOTU_v25_03812	15.4992	-4.73185	1.95191	<0.001	0.00531
unknown RUG440	rumen_mOTU_1175	15.884	-6.85165	3.63237	<0.001	0.005732
unknown Bacteroidales	rumen_mOTU_73	55.3057	-4.43324	2.02813	<0.001	0.006522
unknown UBA2856	rumen_mOTU_809	16.0241	-6.74356	3.64885	<0.001	0.006522
unknown Lachnotalea	rumen_mOTU_763	76.3317	10.575	5.44637	<0.001	0.00712
unknown Spirochaetaceae	rumen_mOTU_840	12.1523	-6.03894	3.29104	0.00104	0.008113
Succinivibrio dextrinosolvens	ref_mOTU_v25_02463	13.3902	-7.09402	4.15356	0.001136	0.008732
unknown ISO4-G1	rumen_mOTU_729	48.9558	-5.11182	3.04406	0.001226	0.009077
unknown Bacteroidales	rumen_mOTU_371	14.8473	-7.06718	4.30844	0.001244	0.0091
unknown UBA2862	rumen_mOTU_408	8.36502	-6.38843	3.79376	0.00134	0.009568
unknown Bacteroidales	rumen_mOTU_2283	9.87125	-7.26747	4.61761	0.001337	0.009568
unknown UBA1764	rumen_mOTU_753	248.678	-4.26647	2.724	0.001434	0.010123
Anaerovibrio lipolyticus	ref_mOTU_v25_02119	10.6734	-6.93277	4.44428	0.001461	0.010195
unknown RUG658	rumen_mOTU_952	8.09735	-6.92061	4.4929	0.001526	0.010528
Enterococcus sp.	ref_mOTU_v25_02783	88.8839	10.1501	6.11196	0.001563	0.010658
unknown CAG-307	rumen_mOTU_2187	6.93138	-6.32761	3.98857	0.001778	0.01136
unknown Succiniclasticum	rumen_mOTU_601	10.4466	-5.98394	3.85643	0.002032	0.012459
unknown Mogibacterium	rumen_mOTU_1274	7.62249	-3.80544	3.8676	0.002252	0.013667
uncultured Sutterella sp.	rumen_mOTU_27	10.0337	-5.82176	3.91298	0.00234	0.013958
unknown UBA2862	rumen_mOTU_399	6.70098	-5.69346	3.76738	0.002346	0.013958
Globicatella sanguinis/sulfidifaciens	ref_mOTU_v25_02265	128.26	8.78517	8.65033	0.00259	0.015117
Selenomonas ruminantium	ref_mOTU_v25_03810	32.2887	-3.48566	2.33944	0.002743	0.015747
unknown RC9	rumen_mOTU_472	22.1751	-3.65838	3.69419	0.00286	0.016072
Succiniclasticum ruminis	ref_mOTU_v25_07090	8.14997	-5.42252	3.78336	0.002994	0.016524
unknown Bacteroidales	rumen_mOTU_92	6.91958	-5.71993	4.24716	0.003156	0.017096
unknown RUG695	rumen_mOTU_1967	7.21992	-5.69388	4.56474	0.003402	0.018112
Prevotella bryantii	ref_mOTU_v25_03809	677.191	-3.24351	2.50324	0.003757	0.019833
unknown UBA2862	rumen_mOTU_1365	11.6678	-2.61459	5.68724	0.004194	0.021434
Pseudomonas guguanensis/mendocina	ref_mOTU_v25_00238	25.2631	2.8955	2.54709	0.005305	0.024638
unknown UBA1067	rumen_mOTU_1411	10.9156	-4.79658	4.50207	0.005358	0.024638
Lachnospiraceae bacterium	ref_mOTU_v25_04246	11.5514	3.43269	2.74046	0.005459	0.02473
uncultured Methanobrevibacter sp.	rumen_mOTU_129	30.0737	-2.45401	1.43036	0.005527	0.024852
Bacteroides sp.	ref_mOTU_v25_04316	5.18833	-4.57963	7.8705	0.005677	0.025019
unknown UBA2862	rumen_mOTU_413	6.02038	-4.72935	5.53563	0.005658	0.025019
unknown ISO4-G1	rumen_mOTU_752	21.6802	-2.85261	2.63101	0.005688	0.025019
unknown UBA1407	rumen_mOTU_407	7.93856	-4.66113	4.81891	0.006288	0.026879
Catabacter sp. UBA2862	rumen_mOTU_417	5.50772	-4.37412	4.56394	0.006986	0.029246
unknown UBA1179	rumen_mOTU_316	6.19278	-4.2894	4.68765	0.007488	0.030921
Supplementary Table S6 Differential abundance between control d10 and Choline bicarbonate d10
Base mean: mean of normalized counts of all samples. log2FoldChange: log2 fold change of control. P value: Wald test. Padj: adjusted P value of Benjamini-Hochberg test.
All mOTUs clusters that met the criteria of Benjamini-Hochberg padj ≤0.05, Wald test p≤0.05 and log2FoldChange ≥2 are listed here.
All positive log2FoldChanges have been highlighted.

## Sheet: Supplementary Table 7
Taxonomy	mOTUs cluster	baseMean	log2FoldChange	lfcSE	p-value	padj
unknown Clostridiales	rumen_mOTU_22	236.744	-15.36	3.82166	<0.001	<0.001
unknown RC9	rumen_mOTU_808	41.0521	-12.42	3.56167	<0.001	<0.001
unknown Selenomonadales	rumen_mOTU_216	143.801	-13.24	3.84018	<0.001	<0.001
Succiniclasticum ruminis	ref_mOTU_v25_11146	56.0504	-11.74	3.54782	<0.001	<0.001
Enterococcus avium	ref_mOTU_v25_02620	769.584	14.32	3.73873	<0.001	<0.001
unknown Bacteroidales	rumen_mOTU_33	72.5328	-13.09	3.93743	<0.001	<0.001
Prevotella sp. UBA4376	rumen_mOTU_270	91.6533	-9.13	1.83416	<0.001	<0.001
Prevotella ruminicola	ref_mOTU_v25_03036	275.925	-14.79	4.3679	<0.001	<0.001
unknown UBA1764	rumen_mOTU_753	248.678	-9.9	2.27358	<0.001	<0.001
Prevotella sp. UBA2809	rumen_mOTU_286	115.876	-13.76	4.19039	<0.001	<0.001
uncultured Methanobrevibacter sp.	rumen_mOTU_129	30.0737	-7.16	1.57412	<0.001	<0.001
unknown RUG563	rumen_mOTU_782	73.0521	-13.23	4.09551	<0.001	<0.001
unknown Bacteroidales	rumen_mOTU_205	63.96	-12.41	3.90058	<0.001	<0.001
unknown UBA4372	rumen_mOTU_746	22.8974	-11.5	3.68601	<0.001	<0.001
unknown Selenomonadales	rumen_mOTU_1690	45.1502	-11.08	3.63874	<0.001	<0.001
unknown Prevotella	rumen_mOTU_722	119.142	-12.69	4.06192	<0.001	<0.001
unknown RUG563	rumen_mOTU_2259	254.076	-14.56	4.57073	<0.001	<0.001
Enterococcus gallinarum/saccharolyticus	ref_mOTU_v25_03214	407.662	12.03	3.49846	<0.001	<0.001
unknown RUG440	rumen_mOTU_2221	42.9212	-12.18	3.97386	<0.001	<0.001
unknown RUG563	rumen_mOTU_395	98.2679	-13.19	4.27218	<0.001	<0.001
Prevotella sp.	ref_mOTU_v25_06406	74.7117	-12.48	4.09957	<0.001	<0.001
unknown Selenomonas_A	rumen_mOTU_620	23.363	-10.48	3.56153	<0.001	<0.001
unknown UBA1066	rumen_mOTU_703	101.735	-13.42	4.37667	<0.001	<0.001
unknown RUG563	rumen_mOTU_2203	89.3575	-13.27	4.33677	<0.001	<0.001
unknown UBA2918	rumen_mOTU_750	66.285	-12.61	4.1894	<0.001	<0.001
Lachnospiraceae bacterium FE2018	ref_mOTU_v25_08199	21.8303	-9.78	2.40804	<0.001	<0.001
unknown UBA2856	rumen_mOTU_809	16.0241	-11.25	3.86332	<0.001	<0.001
unknown RC9	rumen_mOTU_426	23.4827	-11.47	3.92746	<0.001	<0.001
unknown ISO4-G1	rumen_mOTU_729	48.9558	-12.48	4.21528	<0.001	<0.001
unknown Clostridiales	rumen_mOTU_234	27.5668	-11.48	3.95556	<0.001	<0.001
unknown Prevotella	rumen_mOTU_295	199.693	-14.13	4.78622	<0.001	<0.001
unknown RC9	rumen_mOTU_1173	21.0232	-10	3.551	<0.001	<0.001
unknown Alkaliphilus	rumen_mOTU_765	491.14	11.03	3.47993	<0.001	<0.001
uncultured Prevotella sp.	rumen_mOTU_190	96.8392	-12.2	4.23771	<0.001	<0.001
unknown Mogibacterium	rumen_mOTU_1266	19.6962	-10.67	3.78052	<0.001	<0.001
unknown RC9	rumen_mOTU_612	25.7639	-11.26	3.97627	<0.001	<0.001
unknown Clostridiales	rumen_mOTU_187	9.39987	-6.65	2.12089	<0.001	<0.001
unknown Prevotella	rumen_mOTU_963	83.4324	-12.92	4.5152	<0.001	<0.001
unknown UBA1066	rumen_mOTU_596	51.1465	-12.41	4.35712	<0.001	<0.001
Selenomonas ruminantium	ref_mOTU_v25_04248	41.3925	-11.92	4.19525	<0.001	<0.001
unknown RC9	rumen_mOTU_497	21.5191	-10.8	3.85629	<0.001	<0.001
unknown Clostridiales	rumen_mOTU_203	24.8547	-8.96	3.33291	<0.001	<0.001
unknown CAG-74	rumen_mOTU_757	65.6435	-12.66	4.52583	<0.001	<0.001
unknown UBA1067	rumen_mOTU_798	32.0246	-10.65	3.86552	<0.001	<0.001
unknown UBA1412	rumen_mOTU_2251	37.32	-12.22	4.41455	<0.001	<0.001
unknown Clostridiales	rumen_mOTU_851	17.6469	-10.34	3.80786	<0.001	<0.001
unknown Bacteroidales	rumen_mOTU_73	55.3057	-9.55	3.60018	<0.001	<0.001
unknown Clostridiales	rumen_mOTU_700	24.9662	-10.5	3.93586	<0.001	<0.001
unknown Clostridiales	rumen_mOTU_44	27.8167	-7.09	1.91427	<0.001	<0.001
unknown Prevotella	rumen_mOTU_783	121.544	-12.66	4.73752	<0.001	<0.001
unknown RUG440	rumen_mOTU_802	19.9086	-10.3	3.89333	<0.001	<0.001
Selenomonas ruminantium	ref_mOTU_v25_03813	9.91978	-9.38	3.60137	<0.001	<0.001
Selenomonas sp. AE3005	ref_mOTU_v25_03814	23.5931	-7.74	2.181	<0.001	<0.001
uncultured Prevotella sp.	rumen_mOTU_211	108.27	-12.39	4.68238	<0.001	<0.001
unknown ISO4-G1	rumen_mOTU_752	21.6802	-7.42	2.34271	<0.001	<0.001
Schwartzia succinivorans	ref_mOTU_v25_07054	48.7448	-6.69	2.30075	<0.001	<0.001
uncultured Methanobrevibacter sp.	rumen_mOTU_235	8.44662	-6.91	2.21148	<0.001	<0.001
unknown ISO4-G1	rumen_mOTU_784	79.9905	-8.55	2.72531	<0.001	<0.001
Selenomonas ruminantium	ref_mOTU_v25_03810	32.2887	-6.24	2.15201	<0.001	<0.001
unknown RC9	rumen_mOTU_472	22.1752	-9.74	3.96484	<0.001	<0.001
Selenomonas ruminantium	ref_mOTU_v25_03812	15.4992	-6.48	2.12113	<0.001	<0.001
unknown UBA2862	rumen_mOTU_1365	11.6678	-9.3	3.84613	<0.001	<0.001
unknown GCA-900199385	rumen_mOTU_795	38.652	-10.91	4.52093	<0.001	<0.001
unknown Prevotella	rumen_mOTU_296	12.9636	-9.18	3.8883	<0.001	<0.001
unknown Bacteroidales	rumen_mOTU_371	14.8473	-10	4.25201	<0.001	<0.001
Succinivibrio dextrinosolvens	ref_mOTU_v25_02463	13.3902	-9.8	4.15979	<0.001	<0.001
unknown Clostridiales	rumen_mOTU_511	20.0664	-9.46	4.06882	<0.001	<0.001
Prevotella bryantii	ref_mOTU_v25_03809	677.191	-5.68	1.92975	<0.001	<0.001
unknown Clostridiales	rumen_mOTU_23	6.01168	-8.37	3.65479	<0.001	<0.001
unknown Eubacterium_Q	rumen_mOTU_674	16.5605	-10.4	4.63536	<0.001	<0.001
unknown UBA9732	rumen_mOTU_741	11.1013	-8.71	3.81562	<0.001	<0.001
unknown UBA1407	rumen_mOTU_407	7.93856	-8.95	3.9677	<0.001	<0.001
unknown Prevotella	rumen_mOTU_2298	34.7431	-9.99	4.48296	<0.001	<0.001
unknown Ruminiclostridium_C	rumen_mOTU_749	22.1951	-9.5	4.24687	<0.001	<0.001
unknown Prevotella	rumen_mOTU_801	26.6485	-9.89	4.4309	<0.001	<0.001
uncultured Methanobrevibacter sp.	rumen_mOTU_245	36.7047	-5.94	2.43635	<0.001	<0.001
unknown UBA1179	rumen_mOTU_316	6.19278	-8.51	3.84047	<0.001	0.001
unknown RUG440	rumen_mOTU_1175	15.884	-8.27	3.77032	<0.001	0.00107
unknown UBA636	rumen_mOTU_2287	19.9158	-10.08	4.72541	<0.001	0.00107
unknown Clostridiales	rumen_mOTU_367	13.4799	-9.64	4.504	<0.001	0.00113
unknown UBA4263	rumen_mOTU_1111	8.56736	-8.96	4.16818	<0.001	0.00113
unknown UBA1777	rumen_mOTU_2262	14.076	-10.03	4.80806	<0.001	0.00117
unknown Prevotella	rumen_mOTU_268	14.3899	-9.76	4.64994	<0.001	0.00119
unknown UBA3624	rumen_mOTU_992	13.5506	-8.53	3.99191	<0.001	0.00124
unknown UBA2862	rumen_mOTU_399	6.70098	-8.05	3.76738	<0.001	0.00134
unknown Prevotella	rumen_mOTU_333	15.9679	-9.53	4.6851	<0.001	0.00152
uncultured Sutterella sp.	rumen_mOTU_27	10.0337	-8.09	3.87584	<0.001	0.00162
Fibrobacter succinogenes	ref_mOTU_v25_05981	24.5026	-9.12	4.43882	<0.001	0.00162
unknown UBA2862	rumen_mOTU_408	8.36502	-8.04	3.86418	<0.001	0.00173
unknown Succiniclasticum	rumen_mOTU_601	10.4466	-8	3.86681	<0.001	0.0018
unknown RUG695	rumen_mOTU_1967	7.21992	-8.51	4.17365	<0.001	0.00182
unknown Eggerthellaceae	rumen_mOTU_2296	5.81176	-8.55	4.16687	<0.001	0.00182
uncultured Prevotella sp.	rumen_mOTU_206	16.838	-9.35	4.74451	<0.001	0.00183
unknown CAG-307	rumen_mOTU_2187	6.93138	-8.23	3.99277	<0.001	0.00183
unknown UBA3636	rumen_mOTU_315	8.42218	-7.88	3.84694	<0.001	0.00186
Anaerovibrio lipolyticus	ref_mOTU_v25_02119	10.6734	-8.7	4.37614	<0.001	0.00201
Catabacter sp. UBA2862	rumen_mOTU_417	5.50772	-7.81	3.85772	<0.001	0.00203
unknown Lentisphaerae	rumen_mOTU_506	16.1648	-8.2	4.1549	<0.001	0.00224
unknown UBA1191	rumen_mOTU_723	28.8382	-4.08	1.73653	<0.001	0.00255
unknown Methanobrevibacter_A	rumen_mOTU_1005	5.29766	-7.11	3.54914	<0.001	0.00261
unknown UBA4372	rumen_mOTU_2194	13.5334	-8.1	4.27376	<0.001	0.00291
Succiniclasticum ruminis	ref_mOTU_v25_07090	8.14997	-7.2	3.78157	<0.001	0.0034
unknown Mailhella	rumen_mOTU_1495	6.23452	-8.25	4.57978	<0.001	0.0034
Lachnospiraceae bacterium	ref_mOTU_v25_04324	6.93243	-7.1	3.68418	<0.001	0.00357
uncultured Prevotella sp.	rumen_mOTU_219	12.9173	-8.67	5.07642	<0.001	0.00365
unknown CAG-307	rumen_mOTU_2199	7.48557	-8.02	4.34612	<0.001	0.00373
unknown Methanobrevibacter_A	rumen_mOTU_1699	4.96281	-5.17	2.31583	<0.001	0.00394
unknown Spirochaetaceae	rumen_mOTU_840	12.1523	-7.79	4.4039	<0.001	0.00419
unknown Bacteroidales	rumen_mOTU_92	6.91958	-7.39	4.12515	<0.001	0.00444
unknown UBA2943	rumen_mOTU_1262	10.3222	-8.26	5.14401	<0.001	0.00452
Kandleria vitulina	ref_mOTU_v25_04327	59.8778	-4.13	2.0463	<0.001	0.00497
unknown UBA3796	rumen_mOTU_1234	6.04035	-7.54	4.44399	<0.001	0.00497
uncultured Prevotella sp.	rumen_mOTU_121	7.60964	-7.21	4.22599	0.00103	0.00535
unknown Pseudobutyrivibrio	rumen_mOTU_2309	14.1585	-7.27	4.09193	0.00103	0.00535
unknown UBA2862	rumen_mOTU_413	6.02038	-7.26	4.29766	0.00104	0.00537
unknown Bact-11	rumen_mOTU_300	8.29334	-7.86	4.96855	0.00106	0.00541
unknown UBA2862	rumen_mOTU_1339	5.40519	-7.12	4.19716	0.00106	0.00541
unknown Prevotella	rumen_mOTU_2057	11.2087	-7.39	4.62415	0.0012	0.00594
unknown Mogibacterium	rumen_mOTU_1274	7.62249	-6.98	4.0995	0.00124	0.00609
unknown UBA2862	rumen_mOTU_679	4.12398	-7.13	4.5942	0.00138	0.00663
unknown Clostridiales	rumen_mOTU_909	7.41773	-7.48	5.1547	0.0014	0.00668
unknown UBA2862	rumen_mOTU_2070	3.82002	-6.77	4.25527	0.00148	0.00702
unknown Lachnospiraceae	rumen_mOTU_791	13.0026	-6.88	4.30851	0.00161	0.00757
unknown Clostridiales	rumen_mOTU_1648	5.84617	-6.62	4.43592	0.00186	0.00856
unknown UBA1067	rumen_mOTU_1411	10.9156	-6.31	4.1489	0.0021	0.00941
unknown UBA1191	rumen_mOTU_810	7.3546	-4.99	3.20485	0.00215	0.00957
unknown Erysipelotrichaceae	rumen_mOTU_135	5.50137	-6.23	4.23191	0.00231	0.0102
unknown UBA1066	rumen_mOTU_427	5.00776	-6.57	5.6534	0.00253	0.0109
unknown UBA2862	rumen_mOTU_1349	4.55408	-6.47	5.42122	0.0026	0.0111
unknown Selenomonas_A	rumen_mOTU_1617	3.57591	-6.1	4.19657	0.00263	0.0111
unknown Pseudobutyrivibrio	rumen_mOTU_2271	12.6528	-6.23	4.22893	0.00278	0.0115
unknown UBA2862	rumen_mOTU_1296	3.71567	-6.22	5.0378	0.00286	0.0117
Ruminococcus albus	ref_mOTU_v25_03707	4.40164	-6.22	7.16082	0.00303	0.0123
Globicatella sanguinis/sulfidifaciens	ref_mOTU_v25_02265	128.26	8.81	7.90221	0.0031	0.0124
unknown QANA01	rumen_mOTU_1440	3.6703	-5.93	4.38009	0.00331	0.013
Prevotella sp. MA2016	ref_mOTU_v25_03037	4.41525	-5.54	4.65225	0.00392	0.0153
Butyrivibrio fibrisolvens	ref_mOTU_v25_02162	2.48862	-5.39	4.24776	0.00467	0.018
Selenomonas ruminantium	ref_mOTU_v25_04320	9.09016	-3.28	2.33435	0.00489	0.0182
uncultured Olsenella sp.	rumen_mOTU_130	7.02511	-3.13	2.08912	0.00511	0.0187
Pseudobutyrivibrio ruminis	ref_mOTU_v25_02411	7.95891	-2.18	3.5016	0.0109	0.0348
unknown UBA1191	rumen_mOTU_735	16.3702	-2.12	2.16001	0.0137	0.041
Supplementary Table S7 Differential abundance between control d15 and Choline bicarbonate d15
Base mean: mean of normalized counts of all samples. log2FoldChange: log2 fold change of control. P value: Wald test. Padj: adjusted P value of Benjamini-Hochberg test.
All mOTUs clusters that met the criteria of Benjamini-Hochberg padj ≤0.05, Wald test p≤0.05 and log2FoldChange ≥2 are listed here.
All positive log2FoldChanges have been highlighted.

## Sheet: Supplementary Table 8
Taxonomy	mOTUs cluster	baseMean	log2FoldChange	lfcSE	p-value	padj
unknown Prevotella	rumen_mOTU_295	199.693	-29.91	3.01371	<0.001	<0.001
unknown Prevotella	rumen_mOTU_783	121.544	-29.17	3.01972	<0.001	<0.001
unknown Prevotella	rumen_mOTU_762	46.6487	-27.61	3.42532	<0.001	<0.001
Enterococcus avium	ref_mOTU_v25_02620	769.584	25.35	3.36578	<0.001	<0.001
unknown RC9	rumen_mOTU_696	27.4279	-28.16	3.73957	<0.001	<0.001
unknown Alkaliphilus	rumen_mOTU_765	103.243	20.72	2.75267	<0.001	<0.001
Enterococcus gallinarum/saccharolyticus	ref_mOTU_v25_03214	407.663	23.38	3.17796	<0.001	<0.001
unknown Bacteroidales	rumen_mOTU_157	266.785	-30	4.28075	<0.001	<0.001
unknown Bacteroidales	rumen_mOTU_655	135.879	-30	4.3289	<0.001	<0.001
unknown Clostridiales	rumen_mOTU_22	236.744	-12.3	1.79799	<0.001	<0.001
unknown RC9	rumen_mOTU_2265	58.6314	-29.21	4.50721	<0.001	<0.001
unknown UBA3792	rumen_mOTU_785	23.0943	-28.14	4.48717	<0.001	<0.001
uncultured Elusimicrobium sp.	rumen_mOTU_146	28.9251	-28.4	4.62141	<0.001	<0.001
unknown RC9	rumen_mOTU_776	30.4494	-27.82	4.54702	<0.001	<0.001
unknown UBA737	rumen_mOTU_760	22.2759	-26.52	4.44095	<0.001	<0.001
unknown RC9	rumen_mOTU_808	41.0521	-10.65	1.84468	<0.001	<0.001
unknown UBA1764	rumen_mOTU_753	248.678	-12.18	2.16551	<0.001	<0.001
Lactobacillus agilis	ref_mOTU_v25_04375	35.8257	21.4	3.90769	<0.001	<0.001
unknown Selenomonadales	rumen_mOTU_216	143.802	-11.52	2.13385	<0.001	<0.001
Lachnospiraceae bacterium FE2018	ref_mOTU_v25_08199	21.8303	-10.27	1.91656	<0.001	<0.001
unknown UBA2912	rumen_mOTU_694	73.0673	-12.61	2.36227	<0.001	<0.001
unknown Bacteroidales	rumen_mOTU_751	11.1497	-24.82	4.68934	<0.001	<0.001
uncultured Methanobrevibacter sp.	rumen_mOTU_129	30.0737	-8.69	1.64403	<0.001	<0.001
unknown Clostridiales	rumen_mOTU_187	9.39987	-8.26	1.56543	<0.001	<0.001
Globicatella sanguinis/sulfidifaciens	ref_mOTU_v25_02265	128.26	21.68	4.17281	<0.001	<0.001
Succiniclasticum ruminis	ref_mOTU_v25_11146	56.0504	-10.09	1.95634	<0.001	<0.001
unknown Lachnotalea	rumen_mOTU_763	21.74	19.21	3.79778	<0.001	<0.001
unknown Mogibacterium	rumen_mOTU_1266	19.6962	-9.02	1.79764	<0.001	<0.001
Enterococcus sp.	ref_mOTU_v25_02783	24.9744	19.45	3.92012	<0.001	<0.001
unknown ISO4-G1	rumen_mOTU_729	48.9558	-10.09	2.0747	<0.001	<0.001
unknown Bacteroidales	rumen_mOTU_205	63.96	-10.93	2.25542	<0.001	<0.001
Proteus mirabilis/vulgaris	ref_mOTU_v25_02513	51.025	19.7	4.09299	<0.001	<0.001
unknown Bacteroidales	rumen_mOTU_33	72.5328	-11.51	2.41403	<0.001	<0.001
unknown RUG563	rumen_mOTU_2259	150.266	-13.35	2.82552	<0.001	<0.001
Prevotella sp. UBA2809	rumen_mOTU_286	115.876	-12.3	2.61607	<0.001	<0.001
unknown RUG563	rumen_mOTU_395	57.7957	-11.95	2.56097	<0.001	<0.001
unknown ISO4-G1	rumen_mOTU_752	21.6802	-7.82	1.70464	<0.001	<0.001
unknown UBA1066	rumen_mOTU_703	101.735	-12.21	2.67022	<0.001	<0.001
unknown UBA2918	rumen_mOTU_750	66.285	-11.37	2.54273	<0.001	<0.001
unknown Clostridiales	rumen_mOTU_851	17.6469	-9.27	2.09328	<0.001	<0.001
uncultured Prevotella sp.	rumen_mOTU_190	96.8392	-11.07	2.50728	<0.001	<0.001
unknown Selenomonadales	rumen_mOTU_1690	45.1502	-9.67	2.21138	<0.001	<0.001
uncultured Methanobrevibacter sp.	rumen_mOTU_235	8.44662	-7.94	1.81994	<0.001	<0.001
unknown Prevotella	rumen_mOTU_722	119.142	-11.31	2.60418	<0.001	<0.001
unknown Clostridiales	rumen_mOTU_234	27.5668	-10.29	2.38149	<0.001	<0.001
unknown RUG440	rumen_mOTU_2221	42.9212	-10.84	2.51349	<0.001	<0.001
unknown Eubacterium_Q	rumen_mOTU_674	16.5605	-10	2.31997	<0.001	<0.001
unknown UBA2856	rumen_mOTU_809	16.0241	-10.04	2.34409	<0.001	<0.001
unknown RC9	rumen_mOTU_1173	21.0232	-8.76	2.05674	<0.001	<0.001
unknown RUG563	rumen_mOTU_2203	89.3575	-12.07	2.83428	<0.001	<0.001
unknown UBA4372	rumen_mOTU_746	22.8974	-10.04	2.36243	<0.001	<0.001
unknown Prevotella	rumen_mOTU_963	83.4324	-11.97	2.81698	<0.001	<0.001
unknown UBA1191	rumen_mOTU_723	28.8382	-5.57	1.32958	<0.001	<0.001
unknown UBA1412	rumen_mOTU_2251	37.32	-11.32	2.70312	<0.001	<0.001
unknown RC9	rumen_mOTU_612	25.7639	-10.14	2.50174	<0.001	<0.001
unknown UBA1066	rumen_mOTU_596	51.1465	-11.4	2.814	<0.001	<0.001
unknown RUG440	rumen_mOTU_802	19.9086	-9.33	2.31215	<0.001	<0.001
unknown RC9	rumen_mOTU_426	23.4827	-10.26	2.54614	<0.001	<0.001
unknown Clostridiales	rumen_mOTU_203	24.8547	-7.8	1.94447	<0.001	<0.001
unknown Bacteroidales	rumen_mOTU_842	74.493	-11.08	2.77187	<0.001	<0.001
unknown GCA-900199385	rumen_mOTU_795	38.652	-10.33	2.5917	<0.001	<0.001
uncultured Prevotella sp.	rumen_mOTU_211	108.27	-11.69	2.94359	<0.001	<0.001
unknown RC9	rumen_mOTU_497	21.5191	-9.66	2.4352	<0.001	<0.001
unknown Methanobrevibacter_A	rumen_mOTU_1699	4.96281	-6.81	1.71978	<0.001	<0.001
Selenomonas sp. AE3005	ref_mOTU_v25_03814	23.5931	-9.08	2.30351	<0.001	0.00104
unknown Eggerthellaceae	rumen_mOTU_2296	5.81176	-8.27	2.1064	<0.001	0.00107
unknown Clostridiales	rumen_mOTU_44	27.8167	-7.98	2.0336	<0.001	0.00107
unknown RC9	rumen_mOTU_799	53.1227	-11.29	2.88344	<0.001	0.0011
unknown Clostridiales	rumen_mOTU_23	6.01168	-7.71	1.99409	<0.001	0.00132
unknown CAG-74	rumen_mOTU_757	65.6435	-11.78	3.09725	<0.001	0.00169
unknown RC9	rumen_mOTU_472	22.1751	-8.96	2.37348	<0.001	0.00186
unknown UBA1777	rumen_mOTU_2262	14.076	-9.95	2.64285	<0.001	0.00191
unknown Methanobrevibacter_A	rumen_mOTU_1005	5.29766	-6.72	1.79293	<0.001	0.00204
unknown UBA2862	rumen_mOTU_1365	11.6678	-8.53	2.27978	<0.001	0.00204
unknown Clostridiales	rumen_mOTU_367	13.4799	-9.36	2.51687	<0.001	0.00223
Selenomonas ruminantium	ref_mOTU_v25_03813	9.91978	-6.76	1.8449	<0.001	0.0027
unknown Bacteroidales	rumen_mOTU_73	55.3057	-7.96	2.18215	<0.001	0.00284
unknown Prevotella	rumen_mOTU_507	50.603	-11.53	3.16269	<0.001	0.00285
unknown UBA1067	rumen_mOTU_798	32.0246	-9.55	2.62886	<0.001	0.00293
unknown Prevotella	rumen_mOTU_268	14.3899	-9.61	2.65875	<0.001	0.00312
unknown Anaerovibrio	rumen_mOTU_761	64.1627	-11.9	3.29496	<0.001	0.00312
unknown Prevotella	rumen_mOTU_778	66.9964	-11.59	3.2153	<0.001	0.00317
unknown UBA1191	rumen_mOTU_810	7.3546	-6.86	1.9079	<0.001	0.00318
unknown Bacteroidales	rumen_mOTU_371	14.8473	-9.45	2.628	<0.001	0.00318
unknown Clostridiales	rumen_mOTU_700	24.9662	-9.52	2.65202	<0.001	0.00323
unknown Prevotella	rumen_mOTU_801	26.6485	-9.48	2.66898	<0.001	0.0037
unknown Bact-11	rumen_mOTU_300	8.29334	-8.3	2.34419	<0.001	0.00378
unknown UBA4263	rumen_mOTU_1111	8.56736	-8.61	2.43898	<0.001	0.00394
unknown Clostridiales	rumen_mOTU_511	20.0664	-8.86	2.51769	<0.001	0.00406
unknown UBA4372	rumen_mOTU_2194	6.06394	-8.03	2.28889	<0.001	0.00416
unknown UBA1407	rumen_mOTU_407	7.93856	-8.41	2.40173	<0.001	0.00425
unknown UBA9732	rumen_mOTU_741	11.1013	-8.05	2.30574	<0.001	0.00431
uncultured Prevotella sp.	rumen_mOTU_206	16.838	-9.35	2.67872	<0.001	0.00433
unknown Stomatobaculum	rumen_mOTU_2223	14.2085	-10.07	2.89057	<0.001	0.00434
unknown Ruminiclostridium_C	rumen_mOTU_352	4.06689	-7.45	2.14038	<0.001	0.00435
unknown Prevotella	rumen_mOTU_2298	34.7431	-9.63	2.77084	<0.001	0.00443
unknown RUG440	rumen_mOTU_1175	15.884	-7.73	2.24732	<0.001	0.00498
unknown UBA636	rumen_mOTU_2287	19.9158	-9.91	2.88259	<0.001	0.00498
unknown Mailhella	rumen_mOTU_1495	6.23452	-8.4	2.45729	<0.001	0.00528
unknown CAG-307	rumen_mOTU_2187	6.93138	-7.87	2.30427	<0.001	0.00528
unknown Succiniclasticum	rumen_mOTU_601	10.4466	-7.61	2.24263	<0.001	0.00566
unknown UBA1179	rumen_mOTU_316	6.19278	-7.96	2.34631	<0.001	0.00566
unknown Prevotella	rumen_mOTU_296	12.9636	-8.49	2.50706	<0.001	0.00571
unknown RUG695	rumen_mOTU_1967	7.21992	-8.26	2.44756	<0.001	0.00589
unknown Firm-10	rumen_mOTU_1723	4.13215	-8.24	2.46016	<0.001	0.00637
unknown UBA2862	rumen_mOTU_399	6.70098	-7.57	2.27469	<0.001	0.00677
unknown Prevotella	rumen_mOTU_2220	21.2206	-10.22	3.07166	<0.001	0.00677
Catabacter sp. UBA2862	rumen_mOTU_417	5.50772	-7.49	2.25068	<0.001	0.00677
uncultured Prevotella sp.	rumen_mOTU_219	12.9173	-9.02	2.71794	<0.001	0.00686
unknown Prevotellaceae	rumen_mOTU_89	38.3889	-10.97	3.30837	<0.001	0.00687
unknown Succinivibrionaceae	rumen_mOTU_391	19.747	-9.13	2.75635	<0.001	0.00693
unknown Prevotella	rumen_mOTU_1436	19.3052	-9.38	2.83921	<0.001	0.00701
unknown UBA2862	rumen_mOTU_408	8.36502	-7.64	2.31135	<0.001	0.00701
unknown Thermoguttaceae	rumen_mOTU_1154	16.3163	-9.68	2.93167	<0.001	0.00701
unknown Spirochaetaceae	rumen_mOTU_840	4.83528	-7.87	2.42153	0.00115	0.00834
unknown UBA2943	rumen_mOTU_1262	10.3222	-8.76	2.70527	0.0012	0.00862
unknown Pseudobutyrivibrio	rumen_mOTU_2195	12.7104	-9.22	2.85273	0.00122	0.00867
unknown UBA636	rumen_mOTU_442	16.1548	-9.21	2.85145	0.00123	0.00867
Anaerovibrio lipolyticus	ref_mOTU_v25_02119	10.6734	-8.55	2.65057	0.00125	0.00868
unknown UBA1367	rumen_mOTU_2264	15.9152	-9.74	3.02033	0.00125	0.00868
unknown F082	rumen_mOTU_743	17.7731	-9.03	2.80001	0.00127	0.00869
unknown Mogibacterium	rumen_mOTU_1796	5.37622	-7.05	2.18887	0.00128	0.00869
unknown Ruminiclostridium_C	rumen_mOTU_749	22.1951	-9.05	2.81211	0.00129	0.00869
uncultured Sutterella sp.	rumen_mOTU_27	10.0337	-7.7	2.39336	0.0013	0.00869
unknown UBA3624	rumen_mOTU_992	13.5506	-8.12	2.54359	0.00141	0.00937
unknown Oribacterium	rumen_mOTU_755	42.7624	-11.15	3.49858	0.00143	0.00943
unknown UBA4372	rumen_mOTU_686	7.4631	-8.67	2.72269	0.00145	0.00943
unknown UBA2856	rumen_mOTU_1068	5.40247	-8.38	2.63303	0.00145	0.00943
unknown ISO4-G1	rumen_mOTU_784	79.9904	-6.55	2.06163	0.00148	0.00955
unknown UBA2862	rumen_mOTU_679	4.12399	-7.55	2.3984	0.00165	0.0105
Fibrobacter succinogenes	ref_mOTU_v25_05981	24.5025	-8.9	2.82876	0.00165	0.0105
unknown Saccharimonadaceae	rumen_mOTU_2268	14.5723	-10.18	3.24717	0.00173	0.0109
unknown RUG472	rumen_mOTU_950	5.53222	-8.53	2.72583	0.00175	0.0109
unknown Lachnospiraceae	rumen_mOTU_800	11.4355	-8.36	2.68812	0.00187	0.0116
unknown Clostridiales	rumen_mOTU_909	7.41773	-8.13	2.61663	0.00189	0.0116
Ruminobacter amylophilus	ref_mOTU_v25_03039	8.69802	-9	2.90598	0.00196	0.012
unknown UBA1757	rumen_mOTU_742	26.1213	-10.42	3.37812	0.00204	0.0124
unknown Lentisphaerae	rumen_mOTU_506	16.1648	-8.01	2.60271	0.00209	0.0126
unknown RC9	rumen_mOTU_536	8.20623	-8.59	2.7919	0.0021	0.0126
unknown UBA3796	rumen_mOTU_1234	6.04035	-7.73	2.53624	0.00229	0.0136
unknown UBA2862	rumen_mOTU_413	6.02038	-7.42	2.43703	0.00232	0.0137
unknown UBA2862	rumen_mOTU_2070	3.82002	-7.05	2.31827	0.00236	0.0138
unknown UBA1066	rumen_mOTU_427	5.00776	-7.62	2.52611	0.00256	0.0147
unknown UBA2862	rumen_mOTU_1339	5.40519	-7.25	2.40579	0.00257	0.0147
unknown UBA3636	rumen_mOTU_315	8.42219	-7.52	2.49613	0.00258	0.0147
unknown Oscillospiraceae	rumen_mOTU_2281	16.1448	-8.37	2.77855	0.00259	0.0147
Ruminococcus albus	ref_mOTU_v25_03707	4.40164	-7.76	2.58611	0.0027	0.0153
unknown Bacteroidales	rumen_mOTU_92	6.91958	-7.36	2.45811	0.00274	0.0153
unknown Prevotella	rumen_mOTU_2247	25.7974	-8.34	2.785	0.00274	0.0153
unknown RC9	rumen_mOTU_1728	5.02591	-8.01	2.68001	0.00281	0.0156
unknown UBA1066	rumen_mOTU_1540	4.79907	-8.27	2.77244	0.00284	0.0156
unknown Bacteroidales	rumen_mOTU_50	27.1393	-7.93	2.6586	0.00287	0.0157
unknown UBA2862	rumen_mOTU_1349	4.55408	-7.45	2.50301	0.00293	0.0159
unknown UBA4647	rumen_mOTU_2306	7.82303	-6	2.02565	0.00308	0.0165
uncultured Prevotella sp.	rumen_mOTU_121	7.60964	-7.32	2.47398	0.00308	0.0165
unknown Firmicutes	rumen_mOTU_81	4.89343	-7.69	2.59939	0.00311	0.0165
unknown Selenomonas_A	rumen_mOTU_620	23.363	-5.37	1.81836	0.00317	0.0168
unknown Solobacterium	rumen_mOTU_2263	18.8342	-9.48	3.22886	0.00332	0.0174
unknown Bacteroidales	rumen_mOTU_162	8.11504	-7.56	2.57726	0.00336	0.0175
uncultured Prevotella sp.	rumen_mOTU_821	8.15905	-7.77	2.65003	0.00338	0.0175
unknown Clostridiales	rumen_mOTU_645	13.5679	-9	3.07679	0.00344	0.0178
unknown UBA4372	rumen_mOTU_2217	50.2346	-9.74	3.33607	0.00351	0.018
unknown Oscillospiraceae	rumen_mOTU_2295	11.6152	-9.36	3.21841	0.00362	0.0185
unknown Prevotella	rumen_mOTU_2057	11.2087	-7.73	2.67911	0.0039	0.0195
unknown Prevotellaceae	rumen_mOTU_66	7.97402	-6.98	2.4194	0.00392	0.0195
unknown UBA9732	rumen_mOTU_1426	5.39884	-7.38	2.55931	0.00392	0.0195
unknown Anaerolineaceae	rumen_mOTU_1272	10.4628	-8.35	2.89455	0.00393	0.0195
unknown Gastranaerophilaceae	rumen_mOTU_2230	11.1851	-9.83	3.41157	0.00395	0.0195
unknown Clostridiales	rumen_mOTU_1648	5.84617	-7.05	2.44952	0.00401	0.0197
unknown RC9	rumen_mOTU_781	45.6497	-11.3	3.93061	0.00405	0.0198
unknown UBA2862	rumen_mOTU_1296	3.71567	-7.07	2.46104	0.00407	0.0198
unknown UBA1191	rumen_mOTU_735	16.3702	-3.97	1.38978	0.00424	0.0205
unknown Bacteroidales	rumen_mOTU_2283	9.87125	-7.74	2.71216	0.00434	0.0208
Prevotella sp.	ref_mOTU_v25_03035	12.1642	-8.14	2.8591	0.00443	0.0211
unknown Prevotella	rumen_mOTU_319	24.8855	-10.07	3.54808	0.00455	0.0215
unknown UBA2862	rumen_mOTU_1003	2.67764	-6.76	2.38255	0.00455	0.0215
unknown UBA636	rumen_mOTU_698	8.326	-8.04	2.83422	0.00457	0.0215
Succiniclasticum ruminis	ref_mOTU_v25_07090	8.14997	-6.98	2.46501	0.00462	0.0216
unknown CAG-390	rumen_mOTU_719	6.52942	-8.92	3.15691	0.0047	0.0218
unknown UBA932	rumen_mOTU_2184	7.72533	-7.61	2.69399	0.00474	0.0219
unknown UBA3839	rumen_mOTU_759	16.9206	-9.68	3.4311	0.00477	0.0219
Bacteroides sp.	ref_mOTU_v25_04316	5.18833	-7	2.48872	0.00492	0.0225
unknown Prevotella	rumen_mOTU_390	41.9285	-9.54	3.39705	0.005	0.0227
unknown Thermoguttaceae	rumen_mOTU_2305	24.8501	-10.29	3.69193	0.0053	0.0239
unknown RUG563	rumen_mOTU_617	4.78818	-7.12	2.55655	0.00532	0.0239
Prevotella sp. MA2016	ref_mOTU_v25_03037	4.41525	-6.37	2.29051	0.00539	0.0241
unknown UBA9732	rumen_mOTU_693	19.7969	-10.08	3.62652	0.00546	0.0242
unknown UBA636	rumen_mOTU_803	11.6107	-9.24	3.33028	0.00551	0.0242
unknown UBA9959	rumen_mOTU_754	16.3988	-9.26	3.33735	0.00551	0.0242
unknown UBA2862	rumen_mOTU_1249	5.07309	-7.88	2.85197	0.00572	0.025
unknown Methanobrevibacter_A	rumen_mOTU_1599	4.53441	-5.87	2.12616	0.00579	0.0252
unknown Mogibacterium	rumen_mOTU_1274	7.62249	-5.61	2.03718	0.00586	0.0254
unknown QANA01	rumen_mOTU_1440	3.6703	-6.43	2.33534	0.00592	0.0255
unknown Clostridiales	rumen_mOTU_229	3.58138	-7.23	2.62953	0.006	0.0257
unknown Clostridiales	rumen_mOTU_60	4.16119	-6.8	2.49429	0.00644	0.0274
unknown UBA3624	rumen_mOTU_1148	10.1589	-7.26	2.68176	0.00676	0.0287
unknown RUG563	rumen_mOTU_2183	8.87042	-8.12	3.00334	0.00684	0.0289
unknown UBA1066	rumen_mOTU_1498	10.6788	-8.96	3.31822	0.00692	0.029
unknown UBA1066	rumen_mOTU_2225	15.6693	-9.77	3.6398	0.00724	0.0302
unknown Clostridiales	rumen_mOTU_108	3.83907	-7.54	2.81853	0.00745	0.0309
unknown Anaerovoracaceae	rumen_mOTU_2228	20.8395	-10.4	3.88906	0.0075	0.031
unknown RC9	rumen_mOTU_531	13.5887	-8.57	3.2096	0.00759	0.0312
unknown RUG563	rumen_mOTU_675	3.85903	-7.22	2.70778	0.00766	0.0314
unknown UBA1774	rumen_mOTU_1827	2.70214	-6.22	2.33924	0.00781	0.0317
Fibrobacter sp. UBA4373	rumen_mOTU_685	15.379	-8.94	3.35917	0.00781	0.0317
unknown RUG658	rumen_mOTU_2288	5.4433	-8.2	3.08613	0.00787	0.0317
unknown GCA-900199385	rumen_mOTU_398	10.9728	-6.68	2.5177	0.00799	0.0321
unknown Erysipelotrichaceae	rumen_mOTU_135	5.50137	-6.6	2.49483	0.00812	0.0325
unknown Eubacterium_G	rumen_mOTU_1774	4.64829	-6.5	2.46323	0.00831	0.033
unknown Selenomonas_B	rumen_mOTU_537	17.4291	-6.19	2.34653	0.00834	0.033
Pseudobutyrivibrio sp. ACV-2	ref_mOTU_v25_02410	5.43422	-7.4	2.81134	0.0085	0.0335
Oribacterium sp.	ref_mOTU_v25_02817	3.48792	-7.33	2.79147	0.00864	0.0339
unknown Clostridiales	rumen_mOTU_96	2.5125	-6.6	2.52407	0.00889	0.0347
Pannonibacter phragmitetus/indicus	ref_mOTU_v25_02348	5.91876	-8.26	3.16061	0.00897	0.0348
unknown Prevotella	rumen_mOTU_777	30.8877	-10.19	3.91036	0.00917	0.0354
Butyrivibrio fibrisolvens	ref_mOTU_v25_02162	2.48862	-4.76	1.82704	0.00923	0.0354
unknown Tener-01	rumen_mOTU_744	8.93303	-8.93	3.42988	0.00925	0.0354
unknown RUG658	rumen_mOTU_952	8.09735	-6.95	2.67701	0.00947	0.0361
Succinivibrio dextrinosolvens	ref_mOTU_v25_02463	13.3902	-5.54	2.14413	0.00983	0.0373
unknown RUG472	rumen_mOTU_369	3.4117	-7.26	2.82078	0.0101	0.0379
unknown Bacteroidales	rumen_mOTU_462	1.66683	-7.04	2.73736	0.0101	0.0379
Treponema saccharophilum	ref_mOTU_v25_12069	7.27437	-8.15	3.17148	0.0102	0.038
unknown Prevotellaceae	rumen_mOTU_159	11.4364	-7.14	2.78103	0.0102	0.038
unknown UBA1067	rumen_mOTU_1411	10.9156	-6.6	2.58499	0.0107	0.0398
unknown CAG-826	rumen_mOTU_2304	3.55688	-7.59	2.9839	0.011	0.0405
unknown UBA2862	rumen_mOTU_1782	3.19575	-6.72	2.65926	0.0115	0.0423
unknown UBA2862	rumen_mOTU_1577	2.45534	-6.06	2.40787	0.0118	0.0432
unknown CAG-272	rumen_mOTU_267	5.12027	-7.62	3.02824	0.0119	0.0432
unknown Saccharofermentans	rumen_mOTU_2043	3.93797	-6.85	2.72667	0.0119	0.0434
unknown Treponema_D	rumen_mOTU_1403	2.25571	-5.98	2.38043	0.012	0.0434
unknown Ruminiclostridium_C	rumen_mOTU_2224	18.5049	-10.09	4.02018	0.0121	0.0434
Butyrivibrio proteoclasticus	ref_mOTU_v25_03801	4.60398	-7.28	2.90344	0.0121	0.0434
unknown UBA1777	rumen_mOTU_1388	2.50433	-5.99	2.40377	0.0127	0.0453
Bacteroidales bacterium Bact_13	ref_mOTU_v25_09005	14.9389	-10.11	4.0619	0.0128	0.0454
uncultured Olsenella sp.	rumen_mOTU_130	7.02511	-3.41	1.38007	0.0135	0.0477
Supplementary Table S8 Differential abundance between control d15 and pooled Choline chloride, Choline bicarbonate d15.
Base mean: mean of normalized counts of all samples. log2FoldChange: log2 fold change of control. P value: Wald test. Padj: adjusted P value of Benjamini-Hochberg test.
All mOTUs clusters that met the criteria of Benjamini-Hochberg padj ≤0.05, Wald test p≤0.05 and log2FoldChange ≥2 are listed here.
All positive log2FoldChanges have been highlighted.
